# Supplementary material
Source: MDPI journal article supplement (https://www.mdpi.com/1424-2818/12/7/276)
Supplement: s1 [file s1]

Archive with 6 entries (6 files):
- FigS1_PRISMA_Method.pdf
- TabS1_topics.xlsx
- TabS2_concentrationMPS.xlsx
- TabS3_biota.xlsx
- TabS4_polymers.xlsx
- TabS5_References.docx
