# Supplementary material
Source: MDPI journal article supplement (https://www.mdpi.com/1424-2818/12/7/276)
Supplement: s1 [file s1 › TabS1_topics.xlsx]

## Sheet: Table S1
ARTICLE REFERENCE	LENTIC OR LOTIC FRESHWATERS	MICROPLASTICS INVESTIGATED IN:
		waters	beaches and nearshore	sediments	snow & ice	birds	fish	microorganisms	modeling	macroinvertebrates	amphibia
Anderson et al., 2017	lentic	x
Arias-Andres et al., 2018	lentic							x
Ballent et al., 2016	lentic		x
Biginagwa et al., 2015	lentic						x
Blettler et al., 2017	lentic		x
Bordós et al., 2019	lentic	x		x
Brookson et al., 2019	lentic					x
Corcoran et al., 2015	lentic		x	x
Corti et al., 2020	lentic		x
Dean et al., 2018	lentic		x
Dong et al., 2020	lentic								x
Egessa et al., 2020	lentic		x	x
Eriksen et al., 2013	lentic	x		x
Faure et al., 2012	lentic	x	x			x	x
Faure et al., 2015	lentic	x	x			x	x
Fischer et al., 2016	lentic	x	x
Free et al., 2014	lentic	x	x
Grbić et al., 2020	lentic	x
Hendrickson et al., 2018	lentic	x
Hoffman and Hittinger, 2017	lentic								x
Hurt et al., 2020	lentic						x
Iannilli et al., 2020	lentic		x							x
Imhof et al., 2016	lentic		x
Imhof et al., 2018	lentic		x
Irfan et al., 2020	lentic	x		x
Jabeen et al., 2017	lentic						x
Jiang et al., 2018	lentic	x	x
Kong et al., 2019	lentic								x
Lenaker et al., 2019	lentic	x		x
Li et al., 2019	lentic	x		x
Luoto et al., 2019	lentic			x
Mason et al., 2016	lentic	x
Migwi et al., 2020	lentic	x
Picó et al., 2020	lentic	x
Qin et al., 2020	lentic			x
Ramandan et al., 2020	lentic	x
Roch et al., 2019	lentic						x
Scopetani et al., 2019	lentic			x	x
Sighicelli et al., 2018	lentic	x
Su et al., 2016	lentic	x		x						x
Su et al., 2018	lentic	x		x						x
Turner et al., 2019	lentic			x
Uurasjärvi et al., 2020	lentic	x
Vaughan et al., 2017	lentic			x
Wang et al., 2017a	lentic	x
Wang et al., 2018a	lentic	x
Wang et al., 2019	lentic	x
Wang et al., 2020	lentic	x
Wen et al., 2018	lentic		x
Xiong et al., 2018	lentic	x	x				x
Yin et al., 2019	lentic	x
Yin et al., 2020	lentic		x
Yuan et al., 2019	lentic	x		x			x
Zhang et al., 2016	lentic		x
TOT LENTIC		28	18	15	1	3	8	1	3	3	0
Agustian Fareza & Sembiring, 2020	lotic	x		x
Akindele et al., 2019	lotic									x
Alam et al., 2019	lotic	x		x
Andrade et al., 2019	lotic						x
Baldwin et al., 2016	lotic	x
Ballent et al., 2016	lotic			x
Battulga et al., 2020	lotic		x
Berglund et al., 2019	lotic									x
Besseling et al., 2017	lotic								x
Blair et al., 2019	lotic			x					x
Blettler et al., 2019	lotic		x				x
Bordós et al., 2019	lotic	x		x
Campanale et al., 2020	lotic	x
Campbell et al., 2017	lotic	x					x
Castañeda et al., 2014	lotic			x
Cheung et al., 2019	lotic	x
Collard et., 2018	lotic						x
Constant et al., 2020	lotic	x	x
Corcoran et al., 2015	lotic		x
Corcoran et al., 2020	lotic			x
Crew et al., 2020	lotic	x		x
Deng et al., 2020	lotic	x		x
Di and Wang, 2018	lotic	x		x
Dikareva and Simon, 2019	lotic	x		x
Ding et al., 2019	lotic	x		x
Domogalla-Urbansky et al., 2019	lotic									x
Dris et al., 2015	lotic	x
Dris et al., 2018	lotic	x
Ebere et al., 2019	lotic	x
Eo et al., 2019	lotic	x		x
Estahbanati and Fahrenfeld, 2016	lotic	x
Fan et al., 2019	lotic	x		x
Faure et al., 2015	lotic	x
Guerranti et al., 2017	lotic			x
He et al., 2020	lotic			x
Hoellein et al., 2017	lotic	x		x				x
Hoellein et al., 2019	lotic								x
Holmes et al., 2020	lotic								x
Horton et al., 2017	lotic			x
Horton et al., 2018	lotic						x
Hurley et al., 2017	lotic			x						x
Hurley et al., 2018	lotic			x
Jia et al., 2020	lotic	x
Jiang et al., 2019	lotic	x		x
Kapp and Yeatman, 2018	lotic	x
Katakota et al., 2019	lotic	x
Kettner, 2017	lotic							x
Kettner, 2019	lotic							x
Klein et al., 2015	lotic			x
Lahens et al., 2018	lotic	x
Lebreton et al., 2017	lotic								x
Lechner et al., 2014	lotic	x							x
Lenaker et al., 2019	lotic	x		x
Leslie et al., 2017	lotic	x		x
Lin et al., 2018	lotic	x		x
Liu et al., 2020	lotic	x					x
Luo et al., 2019	lotic	x
Mani et al., 2016	lotic	x
Mani et al., 2019a	lotic	x
Mani et al., 2019b	lotic			x
Mani and Burkhardt-Holm, 2020	lotic	x
McCormick et al., 2014	lotic	x						x
McCormick et al., 2016	lotic	x						x
McGoran et al., 2017	lotic						x
McNeish et al., 2018	lotic	x					x
Miller et al., 2017	lotic	x
Nan et al., 2020	lotic	x								x
Nel et al., 2018	lotic			x						x
Nizzetto et al., 2016	lotic								x
Ockelford et al., 2020	lotic								x
Park et al., 2020	lotic	x					x
Peng et al., 2018	lotic			x
Peters and Bratton, 2016	lotic						x
Rao et al., 2019	lotic			x
Roch et al., 2019	lotic	x					x
Rodrigues et al., 2018	lotic	x		x
Ryan et al., 2019	lotic	x					x
Said and Heard, 2020	lotic	x
Sanchez et al., 2014	lotic						x
Sarkar et al., 2019	lotic			x
Schessl et al., 2019	lotic			x						x	x
Schmidt et al., 2017	lotic								x
Schmidt et al., 2018	lotic	x
Siegfried et al., 2017	lotic								x
Silva-Cavalcanti et al., 2017	lotic						x
Simmerman and Coleman Wasik, 2020	lotic	x					x			x
Slootmaekers et al., 2019	lotic						x
Song et al., 2020	lotic	x
Strady et al., 2020	lotic	x
Su et al., 2018	lotic	x		x						x
Su et al., 2020	lotic	x		x
Ta and Babel, 2019	lotic	x
Tan et al., 2019	lotic	x
Tibbetts et al., 2018	lotic			x						x
Toumi et al., 2019	lotic			x
Unice et al., 2019a	lotic								x
Unice et al., 2019b	lotic								x
Vermaire et al., 2017	lotic	x		x
Wagner et al., 2019	lotic								x
Waldschlager and Schüttrumpf, 2019	lotic								x
Wang et al., 2017a	lotic	x
Wang et al., 2017b	lotic			x
Wang et al., 2018b	lotic			x
Wang et al., 2020	lotic	x
Watkins et al., 2019	lotic	x							x
Windsor et al., 2019	lotic									x
Wong et al., 2020	lotic	x
Xiong et al., 2018	lotic	x
Yan et al., 2019	lotic	x
Zhang et al., 2015	lotic	x
Zhang et al., 2017	lotic	x		x			x
Zhang et al., 2019	lotic			x
Zhang et al., 2020	lotic	x		x
TOT LOTIC		63	4	41	0	0	17	5	15	11	1
Holland et al., 2016	not available					x
