# Supplementary material
Source: MDPI journal article supplement (https://www.mdpi.com/1424-2818/12/7/276)
Supplement: s1 [file s1 › TabS2_concentrationMPS.xlsx]

## Sheet: Table S2
REFERENCE	FRESHWATER	INVESTIGATED MATRIX	CONTINENT	COUNTRY	SITE	CONCENTRATION OF MICROPLASTICS	UNIT
Alam et al., 2019	Lotic	SEDIMENT	Asia/Oceania	Indonesia	Ciwalengke River	3.03e-05	items/kg
Alam et al., 2019	Lotic	WATER	Asia/Oceania	Indonesia	Ciwalengke River	0.00585	items/m3
Anderson et al., 2017	Lentic	WATER	America	Canada & USA	Lake Winnipeg	400500	items/km2
Augustian Fareza & Sembiring, 2020	Lotic	SEDIMENT	Asia	Indonesia	Citarum River	0.16665	items/g
Augustian Fareza & Sembiring, 2020	Lotic	WATER	Asia	Indonesia	Citarum River	09:34:00	items/m3
Baldwin et al., 2016	Lotic	WATER	America	Canada & USA	Black River	1.2	items/m3
Baldwin et al., 2016	Lotic	WATER	America	Canada & USA	Buffalo River	4.1	items/m3
Baldwin et al., 2016	Lotic	WATER	America	Canada & USA	Cuyahoga River	2.6	items/m3
Baldwin et al., 2016	Lotic	WATER	America	Canada & USA	Genesee River	2	items/m3
Baldwin et al., 2016	Lotic	WATER	America	Canada & USA	Huron River (MI)	1.3	items/m3
Baldwin et al., 2016	Lotic	WATER	America	Canada & USA	Huron River (OH)	1	items/m3
Baldwin et al., 2016	Lotic	WATER	America	Canada & USA	Maumee River	2.6	items/m3
Baldwin et al., 2016	Lotic	WATER	America	Canada & USA	Portage River	1.7	items/m3
Baldwin et al., 2016	Lotic	WATER	America	Canada & USA	Raisin River	0.5	items/m3
Baldwin et al., 2016	Lotic	WATER	America	Canada & USA	Rocky River	2.6	items/m3
Baldwin et al., 2016	Lotic	WATER	America	Canada & USA	Rouge River	10.2	items/m3
Baldwin et al., 2016	Lotic	WATER	America	Canada & USA	Sandusky River	2.1	items/m3
Baldwin et al., 2016	Lotic	WATER	America	Canada & USA	Tonawanda Creek	3.3	items/m3
Baldwin et al., 2016	Lotic	WATER	America	Canada & USA	Burns Ditch	0.3	items/m3
Baldwin et al., 2016	Lotic	WATER	America	Canada & USA	Clinton River	12.2	items/m3
Baldwin et al., 2016	Lotic	WATER	America	Canada & USA	Fox River	3.7	items/m3
Baldwin et al., 2016	Lotic	WATER	America	Canada & USA	Grand River (MI-Michigan)	3.4	items/m3
Baldwin et al., 2016	Lotic	WATER	America	Canada & USA	Grand River (OH-Ohio)	1.2	items/m3
Baldwin et al., 2016	Lotic	WATER	America	Canada & USA	Indiana Harbor Canal	7.1	items/m3
Baldwin et al., 2016	Lotic	WATER	America	Canada & USA	Kalamazoo River	1.5	items/m3
Baldwin et al., 2016	Lotic	WATER	America	Canada & USA	Manitowoc River	0.7	items/m3
Baldwin et al., 2016	Lotic	WATER	America	Canada & USA	Milwaukee River	5.5	items/m3
Baldwin et al., 2016	Lotic	WATER	America	Canada & USA	Nemadji River	0.9	items/m3
Baldwin et al., 2016	Lotic	WATER	America	Canada & USA	Paw Paw River	7	items/m3
Baldwin et al., 2016	Lotic	WATER	America	Canada & USA	Saginaw River	4	items/m3
Baldwin et al., 2016	Lotic	WATER	America	Canada & USA	Sheboygan River	0.6	items/m3
Baldwin et al., 2016	Lotic	WATER	America	Canada & USA	St. Joseph River	1.8	items/m3
Baldwin et al., 2016	Lotic	WATER	America	Canada & USA	St. Louis River	0.8	items/m3
Ballent et al., 2016	Lotic	SEDIMENT	America	Canada & USA	Humber River	730	items/kg
Ballent et al., 2016	Lotic	SEDIMENT	America	Canada & USA	North Channel	780	items/kg
Ballent et al., 2016	Lotic	SEDIMENT	America	Canada & USA	Red Hill Creek	70	items/kg
Ballent et al., 2016	Lotic	SEDIMENT	America	Canada & USA	Six Mile Creek	320	items/kg
Ballent et al., 2016	Lotic	SEDIMENT	America	Canada & USA	Stoney Creek	70	items/kg
Ballent et al., 2016	Lentic	BEACHES AND NEARSHORE	America	Canada & USA	Lake Ontario	13925	items/kg
Battulga et al., 2020	Lotic	BEACHES AND NEARSHORE	Asia	Mongolia	Tuul River	73	items/PSF (polystyrene foam)
Blair et al., 2019	Lotic	SEDIMENT	Europe	UK	Kelvin River	297	items/kg
Blettler et al., 2017	Lentic	BEACHES AND NEARSHORE	America	Argentina	Lake Sétubal	704	items/m2
Blettler et al., 2019	Lotic	BEACHES AND NEARSHORE	America	Argentina	Paraná River	4654	items/m2
Bordós et al., 2019	Lotic	SEDIMENT	Europe	Hungary	Tisza River	0.77	items/kg
Bordós et al., 2019	Lotic	WATER	Europe	Hungary	Tisza River	10	items/m3
Bordós et al., 2019	Lotic	WATER	Europe	Hungary	Zala River	23.85	items/m3
Bordós et al., 2019	Lentic	SEDIMENT	Europe	Hungary	Lake Tisza-tó	0.845	items/kg
Bordós et al., 2019	Lentic	WATER	Europe	Hungary	Lake Tisza-tó	23.12	items/m3
Campanale et al., 2020	Lotic	WATER	Europe	Italy	Oftano River	6.95	items/m3
Campbell et al., 2017	Lotic	WATER	America	Canada	Wascana Creek	3.02	items/m3
Castañeda et al., 2014	Lotic	SEDIMENT	America	Canada	St. Lawrence River	13 759	items/m2
Cheung et al., 2019	Lotic	WATER	Asia	China	Lam Tsuen River	7428	items/m3
Constant et al., 2020	Lotic	WATER	Europe	France	Rhône River	12	items/m3
Constant et al., 2020	Lotic	BEACHES AND NEARSHORE	Europe	France	Têt River	518	items/kg
Constant et al., 2020	Lotic	WATER	Europe	France	Têt River	42	items/m3
Corcoran et al., 2015	Lotic	BEACHES AND NEARSHORE	America	Canada & USA	Lake Ontario	264 micro-meso-macroplastics	items
Corcoran et al., 2015	Lentic	BEACHES AND NEARSHORE	America	Canada & USA	Lake Ontario	4635 micro-meso-macroplastics	items
Corcoran et al., 2015	Lentic	SEDIMENT	America	Canada & USA	Lake Ontario	35	items
Corcoran et al., 2020	Lotic	SEDIMENT	America	Canada	Thames River	304	items/kg
Corti et al., 2020	Lentic	BEACHES AND NEARSHORE	Europe	Italy	Lake Bracciano	00:24:00	mg/g
Crew et al., 2020	Lotic	SEDIMENT	America	Canada	St. Lawrence River	832	items/kg
Crew et al., 2020	Lotic	WATER	America	Canada	St. Lawrence River	00:14:00	items/m3
Dean et al., 2018	Lentic	BEACHES AND NEARSHORE	America	Canada & USA	Lake Erie	146.75	items/kg
Deng et al., 2020	Lotic	WATER	Asia	China	streams of Chongming Island	6.8	items/kg
Deng et al., 2020	Lotic	SEDIMENT	Asia	China	streams of Shaoxing city	670	items/kg
Deng et al., 2020	Lotic	WATER	Asia	China	streams of Shaoxing city	13.6	items/kg
Di & Wang, 2018	Lotic	SEDIMENT	Asia	China	Yangtze River	82	items/kg
Di & Wang, 2018	Lotic	WATER	Asia	China	Yangtze River	4703	items/m3
Dikareva & Simon, 2019	Lotic	SEDIMENT	Oceania	New Zealand	Awaruku Stream	17	items/kg
Dikareva & Simon, 2019	Lotic	WATER	Oceania	New Zealand	Awaruku Stream	22	items/m3
Dikareva & Simon, 2019	Lotic	SEDIMENT	Oceania	New Zealand	Cascades Stream	10	items/kg
Dikareva & Simon, 2019	Lotic	WATER	Oceania	New Zealand	Cascades Stream	21	items/m3
Dikareva & Simon, 2019	Lotic	SEDIMENT	Oceania	New Zealand	Cox Creek	41	items/kg
Dikareva & Simon, 2019	Lotic	WATER	Oceania	New Zealand	Cox Creek	56	items/m3
Dikareva & Simon, 2019	Lotic	SEDIMENT	Oceania	New Zealand	Lucas Creek	9	items/kg
Dikareva & Simon, 2019	Lotic	WATER	Oceania	New Zealand	Lucas Creek	18	items/m3
Dikareva & Simon, 2019	Lotic	SEDIMENT	Oceania	New Zealand	Meola Creek	56	items/kg
Dikareva & Simon, 2019	Lotic	WATER	Oceania	New Zealand	Meola Creek	19	items/m3
Dikareva & Simon, 2019	Lotic	SEDIMENT	Oceania	New Zealand	Motions Creek	10	items/kg
Dikareva & Simon, 2019	Lotic	WATER	Oceania	New Zealand	Motions Creek	35	items/m3
Dikareva & Simon, 2019	Lotic	SEDIMENT	Oceania	New Zealand	New Market Stream	23	items/kg
Dikareva & Simon, 2019	Lotic	WATER	Oceania	New Zealand	New Market Stream	303	items/m3
Dikareva & Simon, 2019	Lotic	SEDIMENT	Oceania	New Zealand	Oakley Creek	15	items/kg
Dikareva & Simon, 2019	Lotic	WATER	Oceania	New Zealand	Oakley Creek	53	items/m3
Dikareva & Simon, 2019	Lotic	SEDIMENT	Oceania	New Zealand	Omaru Stream	34	items/kg
Dikareva & Simon, 2019	Lotic	WATER	Oceania	New Zealand	Omaru Stream	50	items/m3
Dikareva & Simon, 2019	Lotic	SEDIMENT	Oceania	New Zealand	Opanuku Stream	24	items/kg
Dikareva & Simon, 2019	Lotic	WATER	Oceania	New Zealand	Opanuku Stream	114	items/m3
Dikareva & Simon, 2019	Lotic	SEDIMENT	Oceania	New Zealand	Orakei Creek	35	items/kg
Dikareva & Simon, 2019	Lotic	WATER	Oceania	New Zealand	Orakei Creek	227	items/m3
Dikareva & Simon, 2019	Lotic	SEDIMENT	Oceania	New Zealand	Otara Stream	48	items/kg
Dikareva & Simon, 2019	Lotic	WATER	Oceania	New Zealand	Otara Stream	90	items/m3
Dikareva & Simon, 2019	Lotic	SEDIMENT	Oceania	New Zealand	Pakuranga Stream	38	items/kg
Dikareva & Simon, 2019	Lotic	WATER	Oceania	New Zealand	Pakuranga Stream	107	items/m3
Dikareva & Simon, 2019	Lotic	SEDIMENT	Oceania	New Zealand	Papakura Stream	24	items/kg
Dikareva & Simon, 2019	Lotic	WATER	Oceania	New Zealand	Papakura Stream	75	items/m3
Dikareva & Simon, 2019	Lotic	SEDIMENT	Oceania	New Zealand	Puhinui Stream	80	items/kg
Dikareva & Simon, 2019	Lotic	WATER	Oceania	New Zealand	Puhinui Stream	37	items/m3
Dikareva & Simon, 2019	Lotic	SEDIMENT	Oceania	New Zealand	Shakespear Stream	10	items/kg
Dikareva & Simon, 2019	Lotic	WATER	Oceania	New Zealand	Shakespear Stream	18	items/m3
Dikareva & Simon, 2019	Lotic	SEDIMENT	Oceania	New Zealand	Slippery Creek	16	items/kg
Dikareva & Simon, 2019	Lotic	WATER	Oceania	New Zealand	Slippery Creek	23	items/m3
Dikareva & Simon, 2019	Lotic	SEDIMENT	Oceania	New Zealand	Swanson Stream	25	items/kg
Dikareva & Simon, 2019	Lotic	WATER	Oceania	New Zealand	Swanson Stream	64	items/m3
Ding et al., 2019	Lotic	SEDIMENT	Asia	China	Wei River	840	items/kg
Ding et al., 2019	Lotic	WATER	Asia	China	Wei River	0.0072	items/m3
Dris et al., 2015	Lotic	WATER	Europe	France	Marne River	115	items/m3
Dris et al., 2015	Lotic	WATER	Europe	France	Seine River	189	items/m3
Dris et al., 2018	Lotic	WATER	Europe	France	Marne River	100.6	items/m3
Dris et al., 2018	Lotic	WATER	Europe	France	Seine River	31.6	items/m3
Ebere et al., 2019	Lotic	WATER	Africa	Nigeria	Nwangele River	1556	items/l
Ebere et al., 2019	Lotic	WATER	Africa	Nigeria	Obiaraedu River	717	items/l
Ebere et al., 2019	Lotic	WATER	Africa	Nigeria	Ogbajarajara River	1216	items/l
Ebere et al., 2019	Lotic	WATER	Africa	Nigeria	Okumpi River	440	items/l
Ebere et al., 2019	Lotic	WATER	Africa	Nigeria	Onuezuze River	902	items/l
Egessa et al., 2020	Lentic	SEDIMENT	Africa	Uganda	Lake Victoria	6.5	items/kg
Egessa et al., 2020	Lentic	BEACHES AND NEARSHORE	Africa	Uganda	Lake Victoria	50.6	items/kg
Eo et al., 2019	Lotic	SEDIMENT	Asia	South Corea	Nakdong River	1971	items/kg
Eo et al., 2019	Lotic	WATER	Asia	South Corea	Nakdong River	2526.5	items/m3
Eriksen et al., 2013	Lentic	WATER	America	Canada & USA	Lake Erie	105503	items/km2
Eriksen et al., 2013	Lentic	WATER	America	Canada & USA	Lake Huron	2779.38	items/km2
Eriksen et al., 2013	Lentic	WATER	America	Canada & USA	Lake Superior	5390.8	items/km2
Estahbanati and Fahrenfeld, 2016	Lotic	WATER	America	USA (New Jersey)	Raritan River	83.5	items/m3
Fan et al., 2019	Lotic	SEDIMENT	Asia	China	Beijiang River	132	items/kg
Fan et al., 2019	Lotic	WATER	Asia	China	Beijiang River	0.00021	items/m3
Fan et al., 2019	Lotic	SEDIMENT	Asia	China	Dongjiang River	604	items/kg
Fan et al., 2019	Lotic	WATER	Asia	China	Dongjiang River	0.00038	items/m3
Fan et al., 2019	Lotic	SEDIMENT	Asia	China	Pearl River	928	items/kg
Fan et al., 2019	Lotic	WATER	Asia	China	Pearl River	0.00089	items/m3
Fan et al., 2019	Lotic	SEDIMENT	Asia	China	Xijiang River	586	items/kg
Fan et al., 2019	Lotic	WATER	Asia	China	Xijiang River	0.00031	items/m3
Faure et al., 2012	Lentic	BEACHES AND NEARSHORE	Europe	Switzerland & France	Lake Geneva	4	items/l
Faure et al., 2012	Lentic	WATER	Europe	Switzerland & France	Lake Geneva	48146	items/km2
Faure et al., 2015	Lentic	BEACHES AND NEARSHORE	Europe	Switzerland	Lake Brienz	2500	items/m2
Faure et al., 2015	Lentic	WATER	Europe	Switzerland	Lake Brienz	36000	items/km2
Faure et al., 2015	Lentic	BEACHES AND NEARSHORE	Europe	Germany	Lake Constance	320	items/m2
Faure et al., 2015	Lentic	WATER	Europe	Germany	Lake Constance	61000	items/km2
Faure et al., 2015	Lentic	BEACHES AND NEARSHORE	Europe	Switzerland & France	Lake Geneva	2100	items/m2
Faure et al., 2015	Lentic	WATER	Europe	Switzerland & France	Lake Geneva	126500	items/km2
Faure et al., 2015	Lentic	BEACHES AND NEARSHORE	Europe	Italy & Switzerland	Lake Maggiore	1100	items/m2
Faure et al., 2015	Lentic	WATER	Europe	Italy & Switzerland	Lake Maggiore	220000	items/km2
Faure et al., 2015	Lentic	BEACHES AND NEARSHORE	Europe	Switzerland	Lake Neuchâtel	700	items/m2
Faure et al., 2015	Lentic	WATER	Europe	Switzerland	Lake Neuchâtel	61000	items/km2
Faure et al., 2015	Lentic	BEACHES AND NEARSHORE	Europe	Switzerland	Lake Zurich	460	items/m2
Faure et al., 2015	Lentic	WATER	Europe	Switzerland	Lake Zurich	11000	items/km2
Faure et al., 2015	Lotic	WATER	Europe	Switzerland	River Aubonne	0.1	items/m3
Faure et al., 2015	Lotic	WATER	Europe	Switzerland	River Rhône	0.906667	items/m3
Faure et al., 2015	Lotic	WATER	Europe	Switzerland	River Venoge	35.25	items/m3
Faure et al., 2015	Lotic	WATER	Europe	Switzerland	River Vuachère	4.4	items/m3
Fischer et al., 2016	Lentic	BEACHES AND NEARSHORE	Europe	Italy	Lake Bolsena	112	items/kg
Fischer et al., 2016	Lentic	WATER	Europe	Italy	Lake Bolsena	3.02	items/m3
Fischer et al., 2016	Lentic	BEACHES AND NEARSHORE	Europe	Italy	Lake Chiusi	234	items/kg
Fischer et al., 2016	Lentic	WATER	Europe	Italy	Lake Chiusi	2.62	items/m3
Free et al., 2014	Lentic	BEACHES AND NEARSHORE	Asia	Mongolia	Lake Hovsgol	2680.5	g/m2
Free et al., 2014	Lentic	WATER	Asia	Mongolia	Lake Hovsgol	20264	items/km2
Grbić et al., 2020	Lentic	WATER	America	Canada &USA	Lake Ontario	0.8	items/l
Guerranti et al., 2017	Lotic	SEDIMENT	Europe	Italy	Albegna River	286	items/kg
Guerranti et al., 2017	Lotic	SEDIMENT	Europe	Italy	Ombrone River	171	items/kg
Guerranti et al., 2017	Lotic	SEDIMENT	Europe	Italy	Osa River	282	items/kg
He et al., 2020	Lotic	SEDIMENT	Oceania	Australia	Brisbane River	265	items/kg
Hendrickson et al., 2018	Lentic	WATER	America	Canada & USA	Lake Superior	1200	mg/km2
Hollein et al., 2017	Lotic	SEDIMENT	America	USA (Illinois)	North Shore Channel	223	items/l
Hollein et al., 2017	Lotic	WATER	America	USA (Illinois)	North Shore Channel	5.3	items/m3
Horton et al., 2017	Lotic	SEDIMENT	Europe	UK	Cut River	0.0005	items/kg
Horton et al., 2017	Lotic	SEDIMENT	Europe	UK	Lambourn River	0.00022	items/kg
Horton et al., 2017	Lotic	SEDIMENT	Europe	UK	Leach River	0.00019	items/kg
Hurley et al., 2017	Lotic	SEDIMENT	Europe	UK	Irwell River	914	items/kg
Hurley et al., 2018	Lotic	SEDIMENT	Europe	UK	River Irwell and Merley catchments post-flooding	250	items/kg
Hurley et al., 2018	Lotic	SEDIMENT	Europe	UK	River Irwell and Merley catchments pre-flooding	1200	items/kg
Iannilli et al., 2020	Lentic	BEACHES AND NEARSHORE	Europe	Italy	Lake Albano	42.1	g
Iannilli et al., 2020	Lentic	BEACHES AND NEARSHORE	Europe	Italy	Lake Bracciano	35	g
Iannilli et al., 2020	Lentic	BEACHES AND NEARSHORE	Europe	Italy	Lake Vico	12.3	g
Imhof et al., 2016	Lentic	BEACHES AND NEARSHORE	Europe	Italy	Lake Garda	75	items/m2
Imhof et al., 2018	Lentic	BEACHES AND NEARSHORE	Europe	Italy	Lake Garda	3508	items/m2
Irfan et al., 2020	Lentic	WATER	Asia	Pakistan	Lake Rawal	1.42	items/l
Irfan et al., 2020	Lentic	SEDIMENT	Asia	Pakistan	Lake Rawal	104	items/kg
Jia et al., 2020	Lotic	WATER	Asia	China	Pearl River	0.94	items/m3
Jiang et al., 2018	Lentic	SEDIMENT	Asia	China (Hunan)	Lake Dongting	537.5	items/m3
Jiang et al., 2018	Lentic	WATER	Asia	China (Hunan)	Lake Dongting	1216.67	items/m3
Jiang et al., 2019	Lotic	SEDIMENT	Asia	China	Brahmaputra River	90	items/kg
Jiang et al., 2019	Lotic	WATER	Asia	China	Brahmaputra River	517	items/m3
Jiang et al., 2019	Lotic	SEDIMENT	Asia	China	Buqu River	130	items/kg
Jiang et al., 2019	Lotic	WATER	Asia	China	Buqu River	967	items/m3
Jiang et al., 2019	Lotic	SEDIMENT	Asia	China	Lhasa River	188	items/kg
Jiang et al., 2019	Lotic	WATER	Asia	China	Lhasa River	692	items/m3
Jiang et al., 2019	Lotic	SEDIMENT	Asia	China	Naqu River	50	items/kg
Jiang et al., 2019	Lotic	WATER	Asia	China	Naqu River	817	items/m3
Jiang et al., 2019	Lotic	SEDIMENT	Asia	China	Nyang River	65	items/kg
Jiang et al., 2019	Lotic	WATER	Asia	China	Nyang River	483	items/m3
Kapp & Yeatman, 2018	Lotic	WATER	America	USA	Lower Columbia River	0.00148	items/m3
Kapp & Yeatman, 2018	Lotic	WATER	America	USA	Lower Columbia River	2.97	items/m3
Kapp & Yeatman, 2018	Lotic	WATER	America	USA	Snake River	0.00074	items/m3
Kapp & Yeatman, 2018	Lotic	WATER	America	USA	Snake River	2.45	items/m3
Kataoka et al., 2019	Lotic	WATER	Asia	Japan	Ara River	1.13	items/m3
Kataoka et al., 2019	Lotic	WATER	Asia	Japan	Asahi River	0.9	items/m3
Kataoka et al., 2019	Lotic	WATER	Asia	Japan	Edo River	2.77	items/m3
Kataoka et al., 2019	Lotic	WATER	Asia	Japan	Hikosan River	0.43	items/m3
Kataoka et al., 2019	Lotic	WATER	Asia	Japan	Kikuchi River	1.25	items/m3
Kataoka et al., 2019	Lotic	WATER	Asia	Japan	Kitakami River	0.07	items/m3
Kataoka et al., 2019	Lotic	WATER	Asia	Japan	Koetoi River	0	items/m3
Kataoka et al., 2019	Lotic	WATER	Asia	Japan	Koito River	0.79	items/m3
Kataoka et al., 2019	Lotic	WATER	Asia	Japan	Kuji River	0.03	items/m3
Kataoka et al., 2019	Lotic	WATER	Asia	Japan	Kuma River	0	items/m3
Kataoka et al., 2019	Lotic	WATER	Asia	Japan	Kuro River	0.21	items/m3
Kataoka et al., 2019	Lotic	WATER	Asia	Japan	Midori River	2.06	items/m3
Kataoka et al., 2019	Lotic	WATER	Asia	Japan	Miyara River	0.32	items/m3
Kataoka et al., 2019	Lotic	WATER	Asia	Japan	Mogami River	0.45	items/m3
Kataoka et al., 2019	Lotic	WATER	Asia	Japan	Mononobe River	0.74	items/m3
Kataoka et al., 2019	Lotic	WATER	Asia	Japan	Naka River	1.78	items/m3
Kataoka et al., 2019	Lotic	WATER	Asia	Japan	Niyodo River	0	items/m3
Kataoka et al., 2019	Lotic	WATER	Asia	Japan	Obitsu River	3.29	items/m3
Kataoka et al., 2019	Lotic	WATER	Asia	Japan	Ohori River	1.99	items/m3
Kataoka et al., 2019	Lotic	WATER	Asia	Japan	Onga River	0.87	items/m3
Kataoka et al., 2019	Lotic	WATER	Asia	Japan	Sagami River	0.27	items/m3
Kataoka et al., 2019	Lotic	WATER	Asia	Japan	Sendai River	0.94	items/m3
Kataoka et al., 2019	Lotic	WATER	Asia	Japan	Shimoebekorobetsu River	1.21	items/m3
Kataoka et al., 2019	Lotic	WATER	Asia	Japan	Shira River	4.94	items/m3
Kataoka et al., 2019	Lotic	WATER	Asia	Japan	Tama River	0.23	items/m3
Kataoka et al., 2019	Lotic	WATER	Asia	Japan	Tone River	0.62	items/m3
Kataoka et al., 2019	Lotic	WATER	Asia	Japan	Tsurumi River	4.85	items/m3
Kataoka et al., 2019	Lotic	WATER	Asia	Japan	Yoro River	0.71	items/m3
Klein et al., 2015	Lotic	SEDIMENT	Europe	Germany	Main River	1077	items/kg
Klein et al., 2015	Lotic	SEDIMENT	Europe	Germany	Rhine River	1995.5	items/kg
Lahens et al., 2018	Lotic	WATER	Asia	Vietnam	Kenh Te Canal	510140	items/m3
Lahens et al., 2018	Lotic	WATER	Asia	Vietnam	Lo Gom Canal	470025	items/m3
Lahens et al., 2018	Lotic	WATER	Asia	Vietnam	Nhieu Loc - Thi Nghe Canal	280020	items/m3
Lahens et al., 2018	Lotic	WATER	Asia	Viet Nam	Saigon River	295010	items/m3
Lahens et al., 2018	Lotic	WATER	Asia	Vietnam	Tau Hu Canal	270021	items/m3
Lechner et al., 2014	Lotic	WATER	Europe	Austria	Danube River	0.9376	items/m3
Lenaker et al., 2019	Lotic	WATER	America	USA	Kinnickinnic River	3.08	items/m3
Lenaker et al., 2019	Lotic	SEDIMENT	America	USA	Kinnickinnic River	32	items/kg
Lenaker et al., 2019	Lentic	SEDIMENT	America	USA	Lake Michigan	39	items/kg
Lenaker et al., 2019	Lentic	WATER	America	USA	Lake Michigan	0.42	items/m3
Lenaker et al., 2019	Lotic	WATER	America	USA	Menomonee River	2.66	items/m3
Lenaker et al., 2019	Lotic	SEDIMENT	America	USA	Menomonee River	3000	items/kg
Lenaker et al., 2019	Lotic	WATER	America	USA	Milwaukee River	1.76	items/m3
Lenaker et al., 2019	Lotic	SEDIMENT	America	USA	Milwaukee River	1750	items/kg
Leslie et al., 2017	Lotic	SEDIMENT	Europe	Netherlands	Berlagebrug Canal	527	items/kg
Leslie et al., 2017	Lotic	WATER	Europe	Netherlands	Berlagebrug Canal	0.106	items/m3
Leslie et al., 2017	Lotic	SEDIMENT	Europe	Netherlands	Eenhoornsluis Canal	1050	items/kg
Leslie et al., 2017	Lotic	WATER	Europe	Netherlands	Eenhoornsluis Canal	0.077	items/m3
Leslie et al., 2017	Lotic	SEDIMENT	Europe	Netherlands	Hollandse Brug Canal	132	items/kg
Leslie et al., 2017	Lotic	WATER	Europe	Netherlands	Hollandse Brug Canal	0.187	items/m3
Leslie et al., 2017	Lotic	SEDIMENT	Europe	Netherlands	Lijnbaansgracht Canal	10500	items/kg
Leslie et al., 2017	Lotic	WATER	Europe	Netherlands	Lijnbaansgracht Canal	0.116	items/m3
Leslie et al., 2017	Lotic	SEDIMENT	Europe	Netherlands	Meuse River	1400	items/kg
Leslie et al., 2017	Lotic	SEDIMENT	Europe	Netherlands	Noordzeekanaal Canal	68	items/kg
Leslie et al., 2017	Lotic	WATER	Europe	Netherlands	Noordzeekanaal Canal	0.048	items/m3
Leslie et al., 2017	Lotic	SEDIMENT	Europe	Netherlands	Oudezijdskolk Canal	146	items/kg
Leslie et al., 2017	Lotic	WATER	Europe	Netherlands	Oudezijdskolk Canal	0.068	items/m3
Leslie et al., 2017	Lotic	SEDIMENT	Europe	Germany (Bimmen)	Rhine River	1700	items/kg
Leslie et al., 2017	Lotic	SEDIMENT	Europe	Netherlands (Lobith)	Rhine River	4900	items/kg
Li et al., 2019	Lentic	SEDIMENT	Asia	China	Lake Baidang	130	items/kg
Li et al., 2019	Lentic	WATER	Asia	China	Lake Baidang	1320	items/m3
Li et al., 2019	Lentic	SEDIMENT	Asia	China	Lake Caizi	145	items/kg
Li et al., 2019	Lentic	WATER	Asia	China	Lake Caizi	813	items/m3
Li et al., 2019	Lentic	SEDIMENT	Asia	China	Lake Ce	125	items/kg
Li et al., 2019	Lentic	WATER	Asia	China	Lake Ce	260	items/m3
Li et al., 2019	Lentic	SEDIMENT	Asia	China	Lake Chao	225	items/kg
Li et al., 2019	Lentic	WATER	Asia	China	Lake Chao	747	items/m3
Li et al., 2019	Lentic	SEDIMENT	Asia	China	Lake Datong	400	items/kg
Li et al., 2019	Lentic	WATER	Asia	China	Lake Datong	360	items/m3
Li et al., 2019	Lentic	SEDIMENT	Asia	China	Lake Dianshan	140	items/kg
Li et al., 2019	Lentic	WATER	Asia	China	Lake Dianshan	1280	items/m3
Li et al., 2019	Lentic	SEDIMENT	Asia	China (Hubei)	Lake Dong	190	items/kg
Li et al., 2019	Lentic	WATER	Asia	China (Hubei)	Lake Dong	1000	items/m3
Li et al., 2019	Lentic	SEDIMENT	Asia	China (Hunan)	Lake Dongting	310	items/kg
Li et al., 2019	Lentic	WATER	Asia	China (Hunan)	Lake Dongting	293	items/m3
Li et al., 2019	Lentic	SEDIMENT	Asia	China	Lake Futou	110	items/kg
Li et al., 2019	Lentic	WATER	Asia	China	Lake Futou	620	items/m3
Li et al., 2019	Lentic	SEDIMENT	Asia	China	Lake Ge	170	items/kg
Li et al., 2019	Lentic	WATER	Asia	China	Lake Ge	1160	items/m3
Li et al., 2019	Lentic	SEDIMENT	Asia	China	Lake Gucheng	280	items/kg
Li et al., 2019	Lentic	WATER	Asia	China	Lake Gucheng	400	items/m3
Li et al., 2019	Lentic	SEDIMENT	Asia	China (Hunan)	Lake Hong	100	items/kg
Li et al., 2019	Lentic	WATER	Asia	China (Hunan)	Lake Hong	1800	items/m3
Li et al., 2019	Lentic	SEDIMENT	Asia	China	Lake Huashen	90	items/kg
Li et al., 2019	Lentic	WATER	Asia	China	Lake Huashen	840	items/m3
Li et al., 2019	Lentic	SEDIMENT	Asia	China	Lake Liangzi	150	items/kg
Li et al., 2019	Lentic	WATER	Asia	China	Lake Liangzi	680	items/m3
Li et al., 2019	Lentic	SEDIMENT	Asia	China	Lake Longlan	310	items/kg
Li et al., 2019	Lentic	WATER	Asia	China	Lake Longlan	453	items/m3
Li et al., 2019	Lentic	SEDIMENT	Asia	China (Hubei)	Lake Nantaizi	580	items/kg
Li et al., 2019	Lentic	SEDIMENT	Asia	China (Jangxi)	Lake Poyang	165	items/kg
Li et al., 2019	Lentic	WATER	Asia	China (Jangxi)	Lake Poyang	240	items/m3
Li et al., 2019	Lentic	SEDIMENT	Asia	China (Jiangsu)	Lake Taihu	320	items/kg
Li et al., 2019	Lentic	WATER	Asia	China (Jiangsu)	Lake Taihu	530	items/m3
Lin et al., 2018	Lotic	SEDIMENT	Asia	China	Pearl River	1669	items/kg
Lin et al., 2018	Lotic	WATER	Asia	China	Pearl River	2724	items/m3
Liu et al., 2020	Lotic	WATER	Asia	China	Haihe River	37.82	items/m3
Luo et al., 2019 (b)	Lotic	WATER	Asia	China	Huangpu River	0.002	items/m3
Luo et al., 2019 (b)	Lotic	WATER	Asia	China	Shanghai creeks	0.0018	items/m3
Luo et al., 2019 (b)	Lotic	WATER	Asia	China	Suzhou River	0.0024	items/m3
Luoto et al., 2019	Lentic	SEDIMENT	Europe	Norwey (Svalbard)	Lake Revvatnet	2.9	items/cm3
Mani and Burkhardt-Holm, 2020	Lotic	WATER	Europe	Switzerland	Aare River	0.53	items/m3
Mani and Burkhardt-Holm, 2020	Lotic	WATER	Europe	Switzerland	Limmat River	0.3	items/m3
Mani and Burkhardt-Holm, 2020	Lotic	WATER	Europe	Switzerland	Reuss River	0.11	items/m3
Mani and Burkhardt-Holm, 2020	Lotic	WATER	Europe	Switzerland & Germany	Rhine River	5.8	items/m3
Mani et al., 2015	Lotic	WATER	Europe	Germany	Rhine River	5.60121	items/m3
Mani et al., 2018	Lotic	WATER	Europe	Germany	Rhine River	4.6	items/m3
Mani et al., 2019	Lotic	SEDIMENT	Europe	Germany	Rhine River	5665	items/kg
Mason et al., 2016	Lentic	WATER	America	USA	Lake Michigan	1400-100000	items/km2
McCormick et al., 2014	Lotic	WATER	America	USA (Illinois)	North Shore Channel	9.94	items/m3
McCormick et al., 2016	Lotic	WATER	America	USA (Indiana/Illinois)	DuPage River	8.1	items/m3
McCormick et al., 2016	Lotic	WATER	America	USA (Indiana/Illinois)	E Br DuPage River	6	items/m3
McCormick et al., 2016	Lotic	WATER	America	USA (Indiana/Illinois)	Goose Creek	3.45	items/m3
McCormick et al., 2016	Lotic	WATER	America	USA (Indiana/Illinois)	Higgen’s Creek	5.9	items/m3
McCormick et al., 2016	Lotic	WATER	America	USA (Indiana/Illinois)	L Kickapoo Creek	1.02	items/m3
McCormick et al., 2016	Lotic	WATER	America	USA (Indiana/Illinois)	N. Shore Channel	4.98	items/m3
McCormick et al., 2016	Lotic	WATER	America	USA (Indiana/Illinois)	Salt Creek	2.105	items/m3
McCormick et al., 2016	Lotic	WATER	America	USA (Indiana/Illinois)	Springbrook Creek	3.28	items/m3
McCormick et al., 2016	Lotic	WATER	America	USA (Indiana/Illinois)	W Br DuPage River	1.945	items/m3
McNeish et al., 2018	Lotic	WATER	America	USA	Milwaukee River	0.035	items/m3
McNeish et al., 2018	Lotic	WATER	America	USA	Muskegon River	0.002	items/m3
McNeish et al., 2018	Lotic	WATER	America	USA	St. Joseph River	0.09	items/m3
Migwi et al., 2020	Lentic	WATER	Africa	Kenya	Lake Naivasha	0.407	items/m2
Miller et al., 2017	Lotic	WATER	America	USA (New York)	Hudson River	0.00098	items/m3
Nan et al., 2020	Lotic	WATER	Oceania	Australia	Goulburn River and 2 tributaries, 5 sites Melbourne area	0.4	items/l
Nel et al., 2018	Lotic	SEDIMENT	Africa	South Africa	Bloukrans River	83.2	items/kg
Park et al., 2020	Lotic	WATER	Asia	South Korea	Han River and its tributaries	7	items/m3
Peng et al., 2018	Lotic	SEDIMENT	Asia	China	Beishagang River	0.0016	items/kg
Peng et al., 2018	Lotic	SEDIMENT	Asia	China	Caohejing River	0.00154	items/kg
Peng et al., 2018	Lotic	SEDIMENT	Asia	China	Huangpu River	0.00072	items/kg
Peng et al., 2018	Lotic	SEDIMENT	Asia	China	Jiangjiagang River	0.00112	items/kg
Peng et al., 2018	Lotic	SEDIMENT	Asia	China	Shajinggang River	0.00077	items/m3
Peng et al., 2018	Lotic	SEDIMENT	Asia	China	Yujiabang River	0.00041	items/kg
Picó et al., 2020	Lentic	WATER	Asia	Saudi Arabia	Lake Al-Hubail	3.95	items/l
Picó et al., 2020	Lentic	WATER	Asia	Saudi Arabia	Lake Al-Asfar	3.55	items/l
Qin et al., 2020	Lentic	SEDIMENT	Asia	China	Lake Ulansuhai	19	items/kg
Ramadan et al., 2020	Lentic	WATER	Oceania	Indonesia	Lake Jatiluhur	23000	items/km2
Rao et al., 2019	Lotic	SEDIMENT	Asia	China	Yongfeng River	38.5	items/kg
Rodrigues et al., 2018	Lotic	SEDIMENT	Europe	Portugal	Antuã River	324	items/kg
Rodrigues et al., 2018	Lotic	WATER	Europe	Portugal	Antuã River	662	items/m3
Ryan et al., 2019	Lotic	WATER	America	USA (New York)	Hudson River	9.77	items/m3
Said and Heard, 2020	Lotic	WATER	USA	Tennessee	Cumberland River	27.9	items/l
Sarkar et al., 2019	Lotic	SEDIMENT	Asia	India	Ganga River	258.72	items/kg
Schessl et al., 2019	Lotic	SEDIMENT	America	USA (New York)	St. Lawrence River	87	items
Schmidt et al., 2018	Lotic	WATER	Europe	Germany	Britz Canal	0.004	items/m3
Schmidt et al., 2018	Lotic	WATER	Europe	Germany	Teltow Canal	0.0044	items/m3
Scopetani et al., 2019	Lentic	SEDIMENT	Europe	Finland	Lake Vesijärvi	395.5	items/kg
Scopetani et al., 2019	Lentic	ICE	Europe	Finland	Lake Vesijärvi	7.8	items/l
Scopetani et al., 2019	Lentic	SNOW	Europe	Finland	Lake Vesijärvi	117.1	items/l
Sighicelli et al., 2018	Lentic	WATER	Europe	Italy	Lake Garda	25000	items/km2
Sighicelli et al., 2018	Lentic	WATER	Europe	Italy	Lake Iseo	40666.7	items/km2
Sighicelli et al., 2018	Lentic	WATER	Europe	Italy & Switzerland	Lake Maggiore	38333.3	items/km2
Simmerman and Coleman Wasik, 2020	Lotic	WATER	America	USA (Wisconsin)	Kinnickinnic River	2083.5	items/l
Song et al., 2020	lotic	WATER	Asia	China	Yellow River	0.638	items/m2
Strady et al., 2020	Lotic	WATER	Asia	Viet Nam	Saigon River	136.5	items/l
Su et al., 2016	Lentic	SEDIMENT	Asia	China (Jiangsu)	Lake Taihu	122.8	items/kg
Su et al., 2016	Lentic	WATER	Asia	China (Jiangsu)	Lake Taihu	0.0146	items/m3
Su et al., 2018	Lotic	SEDIMENT	Asia	China	Chaohu (near lake)	20	items/kg
Su et al., 2018	Lotic	WATER	Asia	China	Chaohu (near lake)	0.00088	items/m3
Su et al., 2018	Lotic	SEDIMENT	Asia	China	Dianshanhu Rivers (near lake)	60	items/kg
Su et al., 2018	Lotic	WATER	Asia	China	Dianshanhu Rivers (near lake)	0.0009	items/m3
Su et al., 2018	Lotic	SEDIMENT	Asia	China	Gaoyouhu (near lake)	121	items/kg
Su et al., 2018	Lotic	WATER	Asia	China	Gaoyouhu (near lake)	0.0019	items/m3
Su et al., 2018	Lentic	SEDIMENT	Asia	China	Lake Chao	40	items/kg
Su et al., 2018	Lentic	WATER	Asia	China	Lake Chao	0.00125	items/m3
Su et al., 2018	Lentic	SEDIMENT	Asia	China	Lake Dianshan	40	items/kg
Su et al., 2018	Lentic	WATER	Asia	China	Lake Dianshan	0.0005	items/m3
Su et al., 2018	Lentic	SEDIMENT	Asia	China (Jiangsu)	Lake Gaoyou	85	items/kg
Su et al., 2018	Lentic	WATER	Asia	China (Jiangsu)	Lake Gaoyou	0.00175	items/m3
Su et al., 2018	Lentic	SEDIMENT	Asia	China (Jangxi)	Lake Poyang	20	items/kg
Su et al., 2018	Lentic	WATER	Asia	China (Jangxi)	Lake Poyang	0.001	items/m3
Su et al., 2018	Lentic	SEDIMENT	Asia	China (Jiangsu)	Lake Taihu	80	items/kg
Su et al., 2018	Lentic	WATER	Asia	China (Jiangsu)	Lake Taihu	0.002	items/m3
Su et al., 2020	Lotic	SEDIMENT	Oceania	Australia	Werribee, Maribyrnong, Yarra Rivers, Dandenong Creek and streams	149.54	items/kg
Su et al., 2020	Lotic	WATER	Oceania	Australia	Werribee, Maribyrnong, Yarra Rivers, Dandenong Creek and streams	1.28	items/l
Ta and Babel, 2019	Lotic	WATER	Asia	Thailand	River Chao Phraya	41.77	items/m3
Tan et al., 2019	Lotic	WATER	Asia	China	Beijiang River	0.56	items/m3
Tibbetts et al., 2018	Lotic	SEDIMENT	Europe	UK	Blythe River	0.2	items/kg
Tibbetts et al., 2018	Lotic	SEDIMENT	Europe	UK	Bourne River	0.3	items/kg
Tibbetts et al., 2018	Lotic	SEDIMENT	Europe	UK	Ford Brook River	1.6	items/kg
Tibbetts et al., 2018	Lotic	SEDIMENT	Europe	UK	Plants Brook	3.4	items/kg
Tibbetts et al., 2018	Lotic	SEDIMENT	Europe	UK	Tame River	1.67	items/kg
Toumi et al., 2019	Lotic	SEDIMENT	Africa	Tunisia	Ben Hassine Stream	4920	items/kg
Toumi et al., 2019	Lotic	SEDIMENT	Africa	Tunisia	Guenniche Stream	2400	items/kg
Toumi et al., 2019	Lotic	SEDIMENT	Africa	Tunisia	Haima Stream	3915	items/kg
Toumi et al., 2019	Lotic	SEDIMENT	Africa	Tunisia	Jedara Stream	6920	items/kg
Toumi et al., 2019	Lotic	SEDIMENT	Africa	Tunisia	Khima Stream	2340	items/kg
Toumi et al., 2019	Lotic	SEDIMENT	Africa	Tunisia	Tinja Stream	3920	items/kg
Toumi et al., 2019	Lotic	SEDIMENT	Africa	Tunisia	Tliba Stream	2920	items/kg
Turner et al., 2019	Lentic	SEDIMENT	Europe	UK	Hampstead No.1 Pond	186.373	items/kg
Uurasjärvi et al., 2020	Lentic	WATER	Europe	Finland	Lake Kallavesi	0.27	items/m3
Vaughan et al., 2017	Lentic	SEDIMENT	Europe	UK	Lake Edgbaston	0.273333	items/kg
Vermarire et al., 2017	Lotic	SEDIMENT	America	Canada	Ottawa River	0.213	items/g
Vermarire et al., 2017	Lotic	WATER	America	Canada	Ottawa River	0.1	items/l
Vermarire et al., 2017	Lotic	WATER	America	Canada	Ottawa River	1.35	items/m3
Wang et al., 2017	Lotic	WATER	Asia	China	Hanjiang River	2933	items/m3
Wang et al., 2017	Lentic	WATER	Asia	China (Hubei)	Lake Bei	8925	items/m3
Wang et al., 2017	Lentic	WATER	Asia	China (Hubei)	Lake Beitaizi	3825	items/m3
Wang et al., 2017	Lentic	WATER	Asia	China (Hubei)	Lake Dong	5914	items/m3
Wang et al., 2017	Lentic	WATER	Asia	China (Hubei)	Lake Hou	3840	items/m3
Wang et al., 2017	Lentic	WATER	Asia	China (Hubei)	Lake Houguan	3048	items/m3
Wang et al., 2017	Lentic	WATER	Asia	China (Hubei)	Lake Huangjia	3650	items/m3
Wang et al., 2017	Lentic	WATER	Asia	China (Hubei)	Lake Huanzi	8550	items/m3
Wang et al., 2017	Lentic	WATER	Asia	China (Hubei)	Lake Jinyin	4600	items/m3
Wang et al., 2017	Lentic	WATER	Asia	China (Hubei)	Lake Longyang	5283.2	items/m3
Wang et al., 2017	Lentic	WATER	Asia	China (Hubei)	Lake Moshui	5660	items/m3
Wang et al., 2017	Lentic	WATER	Asia	China (Hubei)	Lake Nan	5745	items/m3
Wang et al., 2017	Lentic	WATER	Asia	China (Hubei)	Lake Nantaizi	6162.5	items/m3
Wang et al., 2017	Lentic	WATER	Asia	China (Hubei)	Lake Sanjiao	6390	items/m3
Wang et al., 2017	Lentic	WATER	Asia	China (Hubei)	Lake Sha	3950	items/m3
Wang et al., 2017	Lentic	WATER	Asia	China (Hubei)	Lake Tangxun	3336.6	items/m3
Wang et al., 2017	Lentic	WATER	Asia	China (Hubei)	Lake Tazi	6175	items/m3
Wang et al., 2017	Lentic	WATER	Asia	China (Hubei)	Lake Wu	1660	items/m3
Wang et al., 2017	Lentic	WATER	Asia	China (Hubei)	Lake Yandong	2550	items/m3
Wang et al., 2017	Lentic	WATER	Asia	China (Hubei)	Lake Yanxi	2400	items/m3
Wang et al., 2017	Lentic	WATER	Asia	China (Hubei)	Lake Zhushan	2516	items/m3
Wang et al., 2017	Lotic	WATER	Asia	China	Yangtze River	2516.1	items/m3
Wang et al., 2018	Lentic	WATER	Asia	China (Hunan)	Lake Dongting	1850	items/m3
Wang et al., 2018	Lentic	WATER	Asia	China (Hunan)	Lake Hong	2950	items/m3
Wang et al., 2018	Lotic	SEDIMENT	Asia	China	Wen-Rui Tang River	32947	items/kg
Wang et al., 2019	Lentic	WATER	Asia	China	Lake Ulansuhai	5940	items/m3
Wang et al., 2019	Lentic	WATER	Asia	China	Lake Ulansuhai	5940	items/m3
Wang et al., 2020	Lentic	WATER	Asia	China	Lake Baitukeng	18.75	items/l
Wang et al., 2020	Lentic	WATER	Asia	China	Lake Daquangou	13	items/l
Wang et al., 2020	Lentic	WATER	Asia	China	Lake Jiahezi	21.7	items/l
Wang et al., 2020	Lentic	WATER	Asia	China	Lake Moguhu	21.3	items/l
Wang et al., 2020	Lentic	WATER	Asia	China	Lake Xinhuping	16	items/l
Wang et al., 2020	Lentic	WATER	Asia	China	Lake Yuejin	21	items/l
Wang et al., 2020	Lotic	WATER	Asia	China	River Manas	19.5	items/l
Wang J. et al., 2017	Lotic	SEDIMENT	Asia	China	Beijiang River	361	items/kg
Watikns et al., 2019	Lotic	WATER	America	USA	Fall Creek	7	items/m3
Watikns et al., 2019	Lotic	WATER	America	USA	Six Mile Creek	12	items/m3
Wen et al., 2018	Lentic	SEDIMENT	Asia	China (Hunan)	Lake Dong	635.18	items/kg
Wen et al., 2018	Lentic	SEDIMENT	Asia	China (Hunan)	Lake Donggua	468.03	items/kg
Wen et al., 2018	Lentic	SEDIMENT	Asia	China (Hunan)	Lake Meixi	779.12	items/kg
Wen et al., 2018	Lentic	SEDIMENT	Asia	China (Hunan)	Lake Nianjia	557.63	items/kg
Wen et al., 2018	Lentic	SEDIMENT	Asia	China (Hunan)	Lake Xianjia	270.17	items/kg
Wen et al., 2018	Lentic	SEDIMENT	Asia	China (Hunan)	Lake Yang	375.55	items/kg
Wen et al., 2018	Lentic	SEDIMENT	Asia	China (Hunan)	Lake Yue	536.34	items/kg
Wen et al., 2018	Lentic	SEDIMENT	Asia	China (Hunan)	Lake Yuejin	866.59	items/kg
Wong et al., 2020	Lotic	WATER	Asia	Taiwan	River Dahan	0.0336	g/m3
Wong et al., 2020	Lotic	WATER	Asia	Taiwan	River Keelung	0.0174	g/m3
Wong et al., 2020	Lotic	WATER	Asia	Taiwan	River Tamsui	0.02	g/m3
Wong et al., 2020	Lotic	WATER	Asia	Taiwan	River Xindian	0.005	g/m3
Xiong et al., 2018	Lotic	WATER	Asia	China	Buha River	7363	items/km2
Xiong et al., 2018	Lotic	WATER	Asia	China	Heima River	31292	items/km2
Xiong et al., 2018	Lentic	BEACHES AND NEARSHORE	Asia	China (Qinqhai)	Lake Qinghai	671	items/m2
Xiong et al., 2018	Lentic	WATER	Asia	China (Qinqhai)	Lake Qinghai	381500	items/km2
Xiong et al., 2018	Lotic	WATER	Asia	China	Quanji River	3090	items/km2
Xiong et al., 2018	Lotic	WATER	Asia	China	Shaliu River	8708	items/km2
Yan et al., 2019	Lotic	WATER	Asia	China	Pearl River	15000	items/m3
Yin et al., 2019	Lentic	WATER	Asia	China (Hunan)	Lake Dong	4113	items/m3
Yin et al., 2019	Lentic	WATER	Asia	China (Hunan)	Lake Donggua	5063	items/m3
Yin et al., 2019	Lentic	WATER	Asia	China (Hunan)	Lake Meixi	2563	items/m3
Yin et al., 2019	Lentic	WATER	Asia	China (Hunan)	Lake Nianjia	5600	items/m3
Yin et al., 2019	Lentic	WATER	Asia	China (Hunan)	Lake Xianjia	3825	items/m3
Yin et al., 2019	Lentic	WATER	Asia	China (Hunan)	Lake Yang	2425	items/m3
Yin et al., 2019	Lentic	WATER	Asia	China (Hunan)	Lake Yue	3300	items/m3
Yin et al., 2019	Lentic	WATER	Asia	China (Hunan)	Lake Yuejin	7050	items/m3
Yin et al., 2020	Lentic	BEACHES AND NEARSHORE	Asia	China	Lake Dongting	403	items/kg
Yuan et al., 2019	Lentic	SEDIMENT	Asia	China (Jangxi)	Lake Poyang	240	items/kg
Yuan et al., 2019	Lentic	WATER	Asia	China (Jangxi)	Lake Poyang	0.0195	items/m3
Zhang et al., 2015	Lotic	WATER	Asia	China	Qinggan River	797500	items/km2
Zhang et al., 2015	Lotic	WATER	Asia	China	Tongzhuang River	2350000	items/km2
Zhang et al., 2015	Lotic	WATER	Asia	China	Xiangxi River	11889700	items/km2
Zhang et al., 2015	Lotic	WATER	Asia	China	Yangtze River	8465600	items/km2
Zhang et al., 2015	Lotic	WATER	Asia	China	Yuanshui River	192500	items/km2
Zhang et al., 2016	Lentic	BEACHES AND NEARSHORE	Asia	China (Tibet)	Lake Geren Co	42	items/m2
Zhang et al., 2016	Lentic	BEACHES AND NEARSHORE	Asia	China (Tibet)	Lake Mujiu Co	17	items/m2
Zhang et al., 2016	Lentic	BEACHES AND NEARSHORE	Asia	China (Tibet)	Lake Siling Co	155.25	items/m2
Zhang et al., 2016	Lentic	BEACHES AND NEARSHORE	Asia	China (Tibet)	Lake Wuru Co	117	items/m2
Zhang et al., 2017	Lotic	SEDIMENT	Asia	China	Xiangxi River	472	items/m2
Zhang et al., 2017	Lotic	WATER	Asia	China	Xiangxi River	17127500	items/km2
Zhang et al., 2019	Lotic	SEDIMENT	Asia	China	Gaolan River	4.545	items/m2
Zhang et al., 2019	Lotic	SEDIMENT	Asia	China	Xiangxi River	5285.45	items/m2
Zhang et al., 2020	Lotic	WATER	Asia	China	River Qin	1.17	items/m3
Zhang et al., 2020	Lotic	SEDIMENT	Asia	China	River Qin	42	items/kg
