# Supplementary material
Source: MDPI journal article supplement (https://www.mdpi.com/1424-2818/12/7/276)
Supplement: s1 [file s1 › TabS3_biota.xlsx]

## Sheet: Table S3
Reference	Freshwater type	Continent	Country	Site	Biota	Value	Unit of measurement
Schessl et al., 2019	Lotic	America	USA (New York)	St. Lawrence River	AMPHIBIA	0	occurrence in 31 specimen
Faure et al., 2012	Lentic	Europe	Switzerland & France	Lake Geneva	BIRDS	0	occurrence in 1 specimen
Faure et al., 2015	Lentic	Europe	Switzerland & France	Lake Geneva	BIRDS	8	occurrence in 9 specimen
Holland et al., 2016	na	America	Canada	Northern Territory	BIRDS	11	frequency of occurrence (%)
Brookson et al., 2019	Lentic	America	Canada	Laurentian Great Lakes	BIRDS	86.7	frequency of occurrence(%) of antropogenic debrees (microplasics inclusive) 30 specimen
Blettler et al., 2019	Lotic	America	Argentina	Paraná River	FISH	9.9	occurence (average) in 21 specimen
Park et al., 2020	Lotic	Asia	South Korea	Han River	FISH	22	particles/fish
Slootmaekers et al., 2019	Lotic	Europe	Belgium	Balengracht River	FISH	0	Density (g/cm3) 2 specimens
Slootmaekers et al., 2019	Lotic	Europe	Belgium	Bosbeek River	FISH	0	Density (g/cm3) 2 specimens
Slootmaekers et al., 2019	Lotic	Europe	Belgium	Bovenschelde River	FISH	0	Density (g/cm3) 2 specimens
Slootmaekers et al., 2019	Lotic	Europe	Belgium	Desselse Neet River	FISH	0	Density (g/cm3) 2 specimens
Slootmaekers et al., 2019	Lotic	Europe	Belgium	Dijle River	FISH	0.94	Density (g/cm3) 10 specimens
Slootmaekers et al., 2019	Lotic	Europe	Belgium	Gaverbeek River	FISH	0	Density (g/cm3) 10 specimens
Slootmaekers et al., 2019	Lotic	Europe	Belgium	Ijse River	FISH	5.2	Density (g/cm3) 6 specimens
Slootmaekers et al., 2019	Lotic	Europe	Belgium	Kleine Herk River	FISH	0	Density (g/cm3) 2 specimens
Slootmaekers et al., 2019	Lotic	Europe	Belgium	Kleine Nete River	FISH	0	Density (g/cm3) 2 specimens
Slootmaekers et al., 2019	Lotic	Europe	Belgium	Merkske River	FISH	0	Density (g/cm3) 2 specimens
Slootmaekers et al., 2019	Lotic	Europe	Belgium	RodeLoop River	FISH	0	Density (g/cm3) 2 specimens
Slootmaekers et al., 2019	Lotic	Europe	Belgium	Velpe River	FISH	1.19	Density (g/cm3) 10 specimens
Slootmaekers et al., 2019	Lotic	Europe	Belgium	Wimp River	FISH	2.44	Density (g/cm3) 10 specimens
Slootmaekers et al., 2019	Lotic	Europe	Belgium	Winge River	FISH	0	Density (g/cm3) 6 specimens
Slootmaekers et al., 2019	Lotic	Europe	Belgium	Zwarte Neet River	FISH	0	Density (g/cm3) 2 specimens
Andrade et al., 2019	Lotic	America	Brazil	Xingu River	FISH	30.1	frequency of occurrence (%) in 172 specimens
Silva-Cavalcanti et al., 2017	Lotic	America	Brazil	Pajeú River	FISH	83	frequency of occurrence (%) in 48 specimens
Zhang et al., 2017	Lotic	Asia	China	Xiangxi River	FISH	0.866	particles/fish
Yuan et al., 2019	Lentic	Asia	China (Jangxi)	Lake Poyang	FISH	9	particles/fish
Jabeen et al., 2017	Lentic	Asia	China (Jiangsu)	Lake Taihu	FISH	95.7	frequency of occurrence (%) in 120-240 specimen
Su et al., 2016	Lentic	Asia	China (Jiangsu)	Lake Taihu	FISH	6.35	items/g
Xiong et al., 2018	Lentic	Asia	China (Qinqhai)	Lake Qinghai	FISH	5.4	particles/fish
Collard et., 2018	Lotic	Europe	France	Marne River	FISH	4.18	items/g
Collard et., 2018	Lotic	Europe	France	Seine River	FISH	0.83375	items/g
Hurt et al., 2020	Lentic	America	USA (Illinois)	Lake Evergreen and Lake Bloomington	FISH	100	frequency of occurrence (%) in 41 specimens
Sanchez et al., 2014	Lotic	Europe	France	Bramerit River	FISH	0	frequency of occurrence (%) in 8 specimens
Sanchez et al., 2014	Lotic	Europe	France	Auvézère River	FISH	0	frequency of occurrence (%) in 19 specimens
Sanchez et al., 2014	Lotic	Europe	France	Yerres River	FISH	0	frequency of occurrence (%) in 20 specimens
Sanchez et al., 2014	Lotic	Europe	France	Jouanne River	FISH	12	frequency of occurrence (%) in 19 specimens
Sanchez et al., 2014	Lotic	Europe	France	Dore River	FISH	0	frequency of occurrence (%) in 20 specimens
Sanchez et al., 2014	Lotic	Europe	France	Risle River	FISH	15	frequency of occurrence (%) in 7 specimens
Sanchez et al., 2014	Lotic	Europe	France	Bedat River	FISH	16	frequency of occurrence (%) in 20 specimens
Sanchez et al., 2014	Lotic	Europe	France	Loire River	FISH	22	frequency of occurrence (%) in 20 specimens
Sanchez et al., 2014	Lotic	Europe	France	Chée River	FISH	16	frequency of occurrence (%) in 20 specimens
Sanchez et al., 2014	Lotic	Europe	France	Hers-mort River	FISH	23	frequency of occurrence (%) in 14specimens
Simmerman and Coleman Wasik, 2020	Lotic	America	USA (Wisconsin)	Kinnickinnic River	FISH	621	particles/fish
Roch et al., 2019	Lentic	Europe	Germany	Lake Constance	FISH	18.8	frequency of occurrence (%) in 331 specimen
Roch et al., 2019	Lentic	Europe	Germany	Lake Federsee	FISH	12.5	frequency of occurrence (%) in 40 specimen
Roch et al., 2019	Lentic	Europe	Germany	Lake Ilmensee	FISH	20	frequency of occurrence (%) in 35 specimen
Roch et al., 2019	Lentic	Europe	Germany	Lake Mindelsee	FISH	15.8	frequency of occurrence (%) in 38 specimen
Roch et al., 2019	Lentic	Europe	Germany	Lake Rohrsee	FISH	13.7	frequency of occurrence (%) in 51 specimen
Roch et al., 2019	Lotic	Europe	Germany	Alb River	FISH	25.6	frequency of occurrence (%) in 39 specimens
Roch et al., 2019	Lotic	Europe	Germany	Brettach River	FISH	32.1	frequency of occurrence (%) in 39 specimens
Roch et al., 2019	Lotic	Europe	Germany	Dreisam River	FISH	10	frequency of occurrence (%) in 40 specimens
Roch et al., 2019	Lotic	Europe	Germany	Jagst River	FISH	31.1	frequency of occurrence (%) in 41 specimens
Roch et al., 2019	Lotic	Europe	Germany	Kinzig River	FISH	22.5	frequency of occurrence (%) in 49 specimens
Roch et al., 2019	Lotic	Europe	Germany	Koersch River	FISH	32.5	frequency of occurrence (%) in 40 specimens
Roch et al., 2019	Lotic	Europe	Germany	Murr River	FISH	7.7	frequency of occurrence (%) in 40 specimens
Roch et al., 2019	Lotic	Europe	Germany	Rhein River	FISH	18.7	frequency of occurrence (%) in 40 specimens
Roch et al., 2019	Lotic	Europe	Germany	Wiese River	FISH	7.5	frequency of occurrence (%) in 38 specimens
Roch et al., 2019	Lotic	Europe	Germany	Danube River	FISH	18.8	frequency of occurrence (%) in 40 specimens
Roch et al., 2019	Lotic	Europe	Germany	Neckar River	FISH	7.5	frequency of occurrence (%) in 40 specimens
Roch et al., 2019	Lentic	Europe	Germany Austria & Switzerland	Lake Titisee	FISH	19.2	frequency of occurrence (%) in 26 specimen
Faure et al., 2012	Lentic	Europe	Switzerland & France	Lake Geneva	FISH	0	occurrence in 41 specimen
Faure et al., 2015	Lentic	Europe	Switzerland & France	Lake Geneva	FISH	3	occurrence in 40 specimen
Biginagwa et al., 2015	Lentic	Africa	Tanzania	Lake Victoria	FISH	20	frequency of occurrence (%) in 20 specimen
Horton et al., 2018	Lotic	Europe	UK	Thames River	FISH	0.69	particles/fish(tot. 64 fish)
McGoran et al., 2017	Lotic	Europe	UK	Thames River	FISH	36.3	frequency of occurrence (%) in 76 specimen
Campbell et al., 2017	Lotic	America	Canada	Wascana Creek	FISH	15.4	particles/fish in 181 specimens
McNeish et al., 2018	Lotic	America	USA	Muskegon River	FISH	13	particles/fish
McNeish et al., 2018	Lotic	America	USA	St. Joseph River	FISH	11	particles/fish
Ryan et al., 2019	Lotic	America	USA (New York)	Hudson River	FISH	9	particles/fish in 44 specimen
Peters & Bratton, 2016	Lotic	America	USA (Texas)	Brazos River	FISH	55	frequency of occurrence (%)
Peters & Bratton, 2016	Lotic	America	USA (Texas)	Bosque Rivers	FISH	37	frequency of occurrence (%)
McNeish et al., 2018	Lotic	America	USA	Milwaukee River	FISH	10	particles/fish
Simmerman and Coleman Wasik, 2020	Lotic	America	USA (Wisconsin)	Kinnickinnic River	MACROINVERTEBRATE	17.2	items/g
Su et al., 2018	Lentic	Asia	China (Jiangsu)	Lake Gaoyou	MACROINVERTEBRATE	2	items/g
Su et al., 2018	Lentic	Asia	China (Jiangsu)	Lake Taihu	MACROINVERTEBRATE	2	items/g
Su et al., 2018	Lentic	Asia	China (Jangxi)	Lake Poyang	MACROINVERTEBRATE	0.5	items/g
Su et al., 2018	Lentic	Asia	China	Lake Chao	MACROINVERTEBRATE	0.67	items/g
Su et al., 2018	Lentic	Asia	China	Lake Dianshan	MACROINVERTEBRATE	1	items/g
Su et al., 2018	Lotic	Asia	China	Gaoyouhu Lake Tributary	MACROINVERTEBRATE	2.75	items/g
Su et al., 2018	Lotic	Asia	China	Chaohu (near lake)	MACROINVERTEBRATE	0.7	items/g
Su et al., 2018	Lotic	Asia	China	Dianshanhu Rivers (near lake)	MACROINVERTEBRATE	1.3	items/g
Su et al., 2018	Lotic	Asia	China	South Branch of the Yangtze Estuary	MACROINVERTEBRATE	1.4	items/g
Akindele et al., 2019	Lotic	Europe	Germany	Rhine River	MACROINVERTEBRATE	6.1	items/g
Akindele et al., 2019	Lotic	Africa	Nigeria	Osun River	MACROINVERTEBRATE	3.14	items/g
Domogalla-Urbansky et al., 2019	Lotic	Europe	Germany	The river upstream the discharge of STP effluents	MACROINVERTEBRATE	496	number of particels in 107.6 g wet soft tissue weight
Domogalla-Urbansky et al., 2019	Lotic	Europe	Germany	STP effluent	MACROINVERTEBRATE	928	number of particels in 92.1 g wet soft tissue weight
Domogalla-Urbansky et al., 2019	Lotic	Europe	Germany	Downstream the discharge of STP effluents	MACROINVERTEBRATE	734	number of particels in 109.7 g wet soft tissue weight
Domogalla-Urbansky et al., 2019	Lotic	Europe	Germany	Control pond	MACROINVERTEBRATE	893	number of particels in 104 g wet soft tissue weight
Iannilli et al., 2020	Lentic	Europe	Italy	Lake Albano	MACROINVERTEBRATE	2	items/individual
Iannilli et al., 2020	Lentic	Europe	Italy	Lake Bracciano	MACROINVERTEBRATE	4.8	items/individual
Nan et al., 2020	Lotic	Oceania	Australia	Goulburn River and 2 tributaries, 5 sites Melbourne area	MACROINVERTEBRATE	24	items/g
Nel et al., 2018	Lotic	Africa	South Africa	Bloukrans River	MACROINVERTEBRATE	0.785	items/mg
Berglund et al., 2019	Lotic	Europe	Sweden	Höje River	MACROINVERTEBRATE	1620	number of particles in 64 mussels
Hurley et al., 2017	Lotic	Europe	UK	Irwell River	MACROINVERTEBRATE	129	particles/g of tissue
Tibbetts et al., 2018	Lotic	Europe	UK	Tame River	MACROINVERTEBRATE	N.A.	% of observed cases having microplastics incorporated into the matrix (n = 30) (caddisfly)
Tibbetts et al., 2018	Lotic	Europe	UK	Ford Brook River	MACROINVERTEBRATE	N.A.	% of observed cases having microplastics incorporated into the matrix (n = 30) (caddisfly)
Tibbetts et al., 2018	Lotic	Europe	UK	Plants Brook	MACROINVERTEBRATE	7	% of observed cases having microplastics incorporated into the matrix (n = 30) (caddisfly)
Tibbetts et al., 2018	Lotic	Europe	UK	Bourne River	MACROINVERTEBRATE	0	% of observed cases having microplastics incorporated into the matrix (n = 30) (caddisfly)
Tibbetts et al., 2018	Lotic	Europe	UK	Blythe River	MACROINVERTEBRATE	N.A.	% of observed cases having microplastics incorporated into the matrix (n = 30) (caddisfly)
Windsor et al., 2019	Lotic	Europe	UK	Taff river catchment	MACROINVERTEBRATE	0.073	items/mg
Windsor et al., 2019	Lotic	Europe	UK	Usk river catchment	MACROINVERTEBRATE	0.029	items/mg
Windsor et al., 2019	Lotic	Europe	UK	Wye river catchment	MACROINVERTEBRATE	0.015	items/mg
Schessl et al., 2019	Lotic	America	USA (New York)	St. Lawrence River	MACROINVERTEBRATE	0	items
Kettner, 2019	Lotic	Europe	Germany	Warnow River	MICROORGANISM	1639812	total reads of eukaryotic taxa
Hollein et al., 2017	Lotic	America	USA (Illinois)	North Shore Channel	MICROORGANISM	1950	operational taxonomic unit (OTU) richness on MPs
McCormick et al., 2014	Lotic	America	USA (Illinois)	North Shore Channel	MICROORGANISM	3000	OTUs
McCormick et al., 2016	Lotic	America	USA (Indiana/Illinois)	North Shore Channel	MICROORGANISM	1748*	OTUs
				Higgen’s Creek
				Springbrook Creek
				L Kickapoo Creek
				Schererville Ditch
				Goose Creek
				DuPage River
				W Br DuPage River
				Salt Creek
				E Br DuPage River
Arias-Andres et al., 2018	Lentic	Europe	Germany	Lake Dagow	MICROORGANISM	n/d
Arias-Andres et al., 2018	Lentic	Europe	Germany	Lake Grosse Fuchskuhle	MICROORGANISM	n/d
Arias-Andres et al., 2018	Lentic	Europe	Germany	Lake Stechlin	MICROORGANISM	n/d
Kettner et al., 2017	Lotic	Europe	Germany	Warnow River	MICROORGANISM (Fungi)	16390	OTUs
							* The value is referred to 10 study streams.
