# Supplementary material
Source: MDPI journal article supplement (https://www.mdpi.com/1424-2818/12/7/276)
Supplement: s1 [file s1 › TabS4_polymers.xlsx]

## Sheet: DATA
Continent	Country (Region)	River/Lake	Reference	Investigated matrices (water, sediments) and biota	Are primary and secondary MPs indicated in the study? (1=yes; 0=no)	most common (1=primary; 2= secondary)	Presence of chemical analysis of environmental MPs (1=yes; 0=no)	identification technique	Most common microplastics type found (e.g. PET, PP, PVC)		Key
Africa	Nigeria (Osun River)	River	Akindele et al., 2019	biota (macroinvertebrates)	1	2	1	μFTIR	PE		PE	Polyethylene
Europe	Germany (Rhine River)	River	Akindele et al., 2019	biota (macroinvertebrates)	1	2	1	μFTIR	PA , PP		PET	Polyethylene terephthalate
Asia	Indonesia	River	Alam et al., 2019	water/sediment	0		1	Raman	Polymer mixture		PP	Polypropylene
America	Canada	Lake	Anderson et al., 2017	water	0		0	SEM-EDS			PP/EPR	Polypropylene/ethylene-propylene rubber
America	Brazil	River	Andrade et al., 2019	biota (fish)	0		1	ATR-FTIR	PE		PS	Polystyrene
Europe	Germany	Lake	Arias-Andres et al., 2018	fouling	0		NA				PHM	Poly(hexadecyl) methacrylate
Asia	Indonesia	River	Augustian Fareza & Sembiring, 2020	water/sediment	0		0				EPS	expanded polystyrene
America	Canada/USA	River	Baldwin et al., 2016	water	0		0				EEAC	Ethylene/ethyl acrylate copolymer
America	Canada/USA	River/Lake	Ballent et al., 2016	sediment	0		1	Raman, X-ray	PE		PVC	Polyvinyl chloride
Asia	Mongolia	River	Battulga et al., 2020	beaches and nearshore	0		1	μFTIR	PS, PA		PTFE	politetrafluoroetilene
Europe	Sweden	River	Berglund et al., 2019	biota (macroinvertebrates)	1	2	0				PES	Polyester
Africa	Tanzania/Uganda/Kenya	Lake	Biginagwa et al., 2015	biota	0		1	ATR-FTIR	NA		APV	acrylates/polyurethane/varnish cluster
Europe	UK (Scotland)	River	Blair et al., 2019	sediment	1	2	0	SEM-EDS			PS/DVB	polystyrene-divinylbenzene
America	Argentina	Lake	Blettler et al., 2017	sediment	0		1	FTIR	NA		PA	polyamide
America	Argentina	River	Blettler et al., 2019	sediment	1	2	1	FTIR	NA
Europe	Hungary	River/Lake	Bordos et al., 2019	water	0		1	ATR-FTIR	PP		NA	Not available
Europe	Hungary	River/Lake	Bordos et al., 2019	sediment	0		1	ATR-FTIR	PP		LDPE	Low desity polyethylene
Europe	Italy	River	Campanale et al., 2020	water	0		1	py–GCMS	NA
America	Canada	River	Campbell et al., 2017	water and biota (fish)	0		0				ATR-FTIR	Attenuated total reflection - FTIR
America	Canada	River	Castaneda et al., 2014	sediment	0		0				FTIR	Fourier Transform Infra Red Spectroscopy
Asia	China	River	Cheung et al., 2019	water	0		1	ATR-FTIR	PP/EPR		ICP-MS	Inductively coupled plasma mass spectrometry
Europe	France	River	Collard et al., 2019	biota (fish liver, muscle)	0		1	Raman	PE		py-GCMS	pyrolysis gas chromatography mass spectrometry
Europe	France	River	Collard et al., 2019	biota (fish stomach contents)	0		1	Raman	PET		Raman	Raman spectroscopy
Europe	France	River	Constant et al., 2020	water	0		1	FTIR	PES, PE, PS
Europe	France	River	Constant et al., 2020	beaches and nearshore	0		1	FTIR	PES
America	Canada/USA	Lake	Corcoran et al., 2015	sediment	0		1	ATR-FTIR	PE		SEM-EDS	Scanning Electron Microscope - Energy Dispersive X-ray Spectrometry
America	Canada	River	Corcoran et al., 2020	sediment	0		1	ATR-FTIR	PE, PET
Europe	Italy	Lake	Corti et al., 2020	sediment	0		1	ATR-FTIR , μFTIR	LDPE		Nile red	Nail red staining method
America	Canada	River	Crew et al., 2020	water	0		0
America	Canada/USA	Lake	Dean et al., 2018	sediment	0		1	FTIR , Raman	PE		SWIR	Short-wave infrared imaging spectroscopy
Asia	China	River	Deng et al., 2020	water	0		1	μFTIR	PES
Asia	China	River	Deng et al., 2020	sediment	0		1	μFTIR	PES
Asia	China	River	Di and Wang, 2018	water/sediment	0		1	μRaman	PS		X-ray	X-ray fluorescence spectroscopy
Oceania	Nuova Zelanda	River	Dikareva and Simon, 2019	water/sediment	1	2	1	FTIR	PHM , EEAC		μFTIR	micro Fourier Transform Infra Red Spectroscopy
Asia	China	River	Ding et al., 2019	water/sediment	0		0	SEM			μRaman	Raman microspectroscopy
Europe	Germany	River	Domogalla-Urbansky et al., 2019	biota (macroinvertebrates)	0		1	μRaman	PVC
Europe	France	River	Dris et al., 2015	water	0		0
Europe	France	River	Dris et al., 2018	water	0		1	FTIR	PET
Africa	Nigeria	River	Ebere et al., 2019	water	0		0
Asia	South Corea	River	Eo et al., 2019	water	0		1	FTIR	PP
Asia	South Corea	River	Eo et al., 2019	sediment	0		1	FTIR	PP
America	Canada/USA	Lake	Eriksen et al., 2013	water	0		0	SEM-EDS
America	USA (New Jersey)	River	Estahbanati and Fahrenfeld, 2016	water	1	2	0
Asia	China	River	Fan et al., 2019	water	0		1	μFTIR	PP
Asia	China	River	Fan et al., 2019	sediment	0		1	μFTIR	PP
Europe	Switzerland/France	Lake	Faure et al., 2012	water	1	NA	0
Europe	Switzerland/France	Lake	Faure et al., 2012	sediment	1	NA	0
Europe	Switzerland/France	Lake	Faure et al., 2012	biota	1	NA	0
Europe	Switzerland/France/Germany/Italy	River/Lake	Faure et al., 2015	water	0		0
Europe	Italy	Lake	Fischer et al., 2016	water	0		0
Europe	Italy	Lake	Fischer et al., 2016	sediment	0		0
Asia	Mongolia	Lake	Free et al., 2014	water	0		0
Asia	Mongolia	Lake	Free et al., 2014	sediment	0		0
Europe	Italy	River	Guerranti et al., 2017	sediment	0		0
Oceania	Australia	River	He et al., 2020	sediment	0		1	ATR-FTIR	PE
America	Canada/USA	Lake	Hendrickson et al., 2018	water	0		1	ATR-FTIR	PE
America	Canada/USA	Lake	Hoffman and Hittinger, 2017	model	0		0
America	Canada	na	Holland et al., 2016	biota (birds)	0		0
America	USA (Illinois)	River	Hoellein et al., 2017	water	0		1	py-GCMS	PP, PS, PE
America	USA (Illinois)	River	Hoellein et al., 2017	sediment	0		1	py-GCMS	PS, PP
America	USA (Illinois)	River	Hoellein et al., 2017	biota (microorganisms)	0		0
Europe	Uk (England)	River	Horton et al., 2017	sediment	1	2	1	Raman	PET
Europe	Uk (England)	River	Horton et al., 2018	biota (fish)	0		1	Raman	PP, PS
Europe	Uk (England)	River	Hurley et al., 2017	sediment/biota (macroinvertebrates)	0		1	ATR-FTIR	PET
Europe	Uk (England)	River	Hurley et al., 2017	sediment/biota (macroinvertebrates)	0		1	ATR-FTIR	PET
Europe	Italy	Lake	Imhof et al., 2018	sediment	0		0
Asia	China (Jiangsu)	Lake	Jabeen et al., 2017	biota (fish)	0		1	μFTIR	cellophane
Asia	China	River	Jia et al., 2020	water	0		1	FTIR	PE
Asia	China (Hunan)	Lake	Jiang et al., 2018	water	0		1	μRaman	PS
Asia	China (Hunan)	Lake	Jiang et al., 2018	sediment	0		1	μRaman	PET
Asia	China	River	Jiang et al., 2019	sediment	0		1	μRaman	PET
Asia	China	River	Jiang et al., 2019	water	0		1	μRaman	PE
America	USA (Idaho, Oregon, Wyoming, Washington)	River	Kapp and Yeatman, 2018	water	0		1	μRaman	PP, PE, PET, PS
Asia	Japan	River	Katakota et al., 2019	water	1	2	1	FTIR	PE
Europe	Germany	River	Kettner, 2017	biota (microorganisms)	0		0
Europe	Germany	River	Kettner, 2019	biota (microorganisms)	0		0
Europe	Germany	River	Klein et al., 2015	sediment	0		1	ATR-FTIR	PS
Asia	Vietnam	River	Lahens et al., 2018	water	0		0
Europe	Austria/Germany	River	Lechner et al., 2014	water	0		0
Europe	Germany	River	Leslie et al., 2017	water	0		0
Europe	Netherlands/Germany	River	Leslie et al., 2017	sediment	0		1	FTIR	NA
Asia	China	Lake	Li et al., 2019	water/sediment	0		1	Raman	PP
Asia	China	River	Lin et al., 2018	water	0		1	μFTIR	PP
Asia	China	River	Lin et al., 2018	sediment	0		1	μFTIR	PE
Asia	China	River	Liu et al., 2020	water	0		1	μFTIR	PE
Asia	China	River	Luo et al., 2019	water	0		1	μFTIR	PES
Europe	Norwey (Svalbard)	Lake	Luoto et al., 2019	sediments	0		0
Europe	Germany	River	Mani et al., 2016	water	0		1	FTIR	PS
Europe	Germany	River	Mani et al., 2019a	water	1	NA	1	Raman , ATR-FTIR , SEM	PS/DVB
Europe	Germany	River	Mani et al., 2019b	sediment	0		1	μFTIR	APV
Europe	Switzerland & Germany	River	Mani and Burkhardt-Holm, 2020	water	0		1	FTIR	PE
America	USA	Lake	Mason et al., 2016	water	1	2	1	SEM-EDS	PE
America	USA (Illinois)	River	McCormick et al., 2014	water	0		0	SEM
America	USA (Illinois)	River	McCormick et al., 2014	biota (microorganisms)	0		0
America	USA (Illinois)	River	McCormick et al., 2016	water	0		1	py- GCMS	PE
America	USA (Indiana/Illinois)	River	McCormick et al., 2016	biota (microorganisms)	0		0
Europe	Uk (England)	River	McGoran et al., 2017	biota (fish)	0		1	FTIR	PA , PET
America	USA (Wisconsin, Michigan)	River	McNeish et al., 2018	water	0		1	FTIR	NA
America	Canada/USA	River	McNeish et al., 2018	biota (fish)	0		1	FTIR	NA
America	USA (New York)	River	Miller et al., 2017	water	0		1	FTIR , μFTIR	PET
Oceania	Australia	River	Nan et al., 2020	water	0		1	FTIR	PES
Oceania	Australia	River	Nan et al., 2020	biota (macroinvertebrates)	0		1	FTIR	Rayon (not plastic)
Africa	South Africa	River	Nel et al., 2018	sediment	0		0
Africa	South Africa	River	Nel et al., 2018	biota (macroinvertebrates)	0		0
Asia	South Korea	River	Park et al., 2020	water	1	2	1	FTIR	silicone and PTFE
Asia	South Korea	River	Park et al., 2020	biota (fish)	1	2	1	FTIR	PTFE
Asia	China	River	Peng et al., 2018	sediment	1	2	1	μFTIR	PP
America	USA (Texas)	River	Peters and Bratton, 2016	biota (fish)	0		0
Asia	China	River	Rao et al., 2019	sediment	1	2	1	ATR-FTIR	PE
Europe	Germany	Lake	Roch et al., 2019	biota (fish)	0		0
Europe	Austria/Germany	River	Roch et al., 2019	biota (fish)	0		0
Europe	Germany	River	Roch et al., 2019	biota (fish)	0		0
Europe	Germany	Lake	Roch et al., 2019	biota (fish)	0		0
Europe	Germany/Austria/Switzerland	Lake	Roch et al., 2019	biota (fish)	0		0
Europe	Portugal	River	Rodrigues et al., 2018	water/sediment	0		1	ATR-FTIR	PE , PP
America	USA (New York)	River	Ryan et al., 2019	biota (fish)	0		0
America	Tennessee	River	Said and Heard, 2020	water	0		0
Europe	France	River	Sanchez et al., 2014	biota (fish)	0		0
Asia	India	River	Sarkar et al., 2019	sediment	0		1	ATR-FTIR	PES, PE and PP
America	Canada	River	Schessl et al., 2019	sediment/biota (macroinvertebrates, amphibia)	0		0
Europe	Germany	River	Schmidt et al., 2018	water	0		1	SWIR	PE
Europe	Italy/Switzerland	Lake	Sighicelli et al., 2018	water	0		1	FTIR	PE
America	Brazil	River	Silva-Cavalcanti et al., 2017	biota (fish)	0		0
America	USA (Wisconsin)	River	Simmerman and Coleman Wasik, 2020	water/biota (macroinvertebrates, fish)	0		0
Europe	Belgium	River	Slootmaekers et al., 2019	biota (fish)	1	2	1	μFTIR , Raman	PET
Asia	China	River	Song et al., 2020	water	0		1	Raman	EPS, PE
Asia	India (Kerala)	Lake	Sruthy and Ramasamy, 2017	sediment	1	2	1	Raman	LDPE
Asia	Vietnam	River	Strady et al., 2020	water	0		0
Asia	China	Lake	Su et al., 2016	water/sediment/biota (fish)	0		1	μFTIR	cellophane
Asia	China	River	Su et al., 2018	water	0		1	μFTIR	PES
Asia	China	River	Su et al., 2018	sediment	0		1	μFTIR	PP
Asia	China	River	Su et al., 2018	biota (macroinvertebrates)	0		1	μFTIR	PES
Asia	China	Lake	Su et al., 2018	water/sediment/biota (macroinvertebrates)	0		1	μFTIR	PES
Oceania	Australia	River	Su et al., 2020	water	0		1	FTIR	PES
Oceania	Australia	River	Su et al., 2020	sediment	0		1	FTIR	PES
Asia	China	River	Tan et al., 2019	water	0		1	μFTIR	PP
Europe	UK(England)	River	Tibbetts et al., 2018	sediment	1	2	1	ATR-FTIR	PE
Europe	UK(England)	River	Tibbetts et al., 2018	biota (macroinvertebrates)	0		0
Africa	Tunisia	River	Toumi et al., 2019	sediment	1	2	1	ATR-FTIR	PP
Europe	UK	Lake	Turner et al., 2019	sediment	0		1	Raman	PS
Europe	UK	Lake	Vaughan et al., 2017	sediment	1	NA	0
America	Canada	River	Vermaire et al., 2017	water/sediment	1	NA	0
Asia	China	River	Wang et al., 2017	water	0		1	FTIR , SEM	PET
Asia	China (Hubei)	Lake	Wang et al., 2017	water	0		1	FTIR , SEM	PET
Asia	China	River	Wang et al., 2017b	sediment	0		1	μFTIR , ICP-MS , SEM	PE, PP , copolymer
Asia	China	River	Wang et al., 2018	sediment	1	NA	1	μFTIR	PE
Asia	China	Lake	Wang et al., 2018	water	1	2	1	Raman	PE, PP
America	USA (New York)	River	Watikns et al., 2019	water	0		1	Confocal Raman	NA
America	Canada/USA	River	Watkins et al., 2019	water	0		1	Confocal Raman	NA
Asia	China (Hunan)	Lake	Wen et al., 2018	water	0		1	μRaman	PS
Europe	UK (Wales)	River	Windsor et al., 2019	biota (macroinvertebrates)	0		1	dark-field spectroscopy	NA
Asia	China	River/Lake	Xiong et al., 2018	water	1	2	1	Raman	PP
Asia	China	Lake	Xiong et al., 2018	biota (fish)	1	2	1	Raman	Pe, PS, PA, PP
Asia	China	Lake	Xiong et al., 2018	sediment	1	2	1	Raman	PE
Asia	China	River	Yan et al., 2019	water	0		1	μRaman , SEM	PA
Asia	China (Hunan)	Lake	Yin et al., 2019	water	0		1	μRaman	PP
Asia	China (Jangxi)	Lake	Yuan et al., 2019	water/sediment/biota (fish)	0		1	Raman	PP
Asia	China	River	Zhang et al., 2015	water	0		1	ATR-FTIR	PE , PP
Asia	China (Tibet)	Lake	Zhang et al., 2016	sediment	0		1	Raman	PP , PE
Asia	China	River	Zhang et al., 2017	sediment	0		1	Raman	PP
Asia	China	River	Zhang et al., 2017	biota (fish)	0		1	Raman	PE
Asia	China	River	Zhang et al., 2017	water	0		1	Raman	PP
Asia	China	River	Zhang et al., 2017	water	0		1	FTIR	PE
Asia	China	River	Zhang et al., 2019	sediment	0		1	ATR-FTIR	PP
Asia	China	Lake	Dong et al., 2020	sediment	0		1	Raman , SEM-EDS	depends on the year
Africa	Uganda	Lake	Egessa et al., 2020	sediment	0		1	FTIR	PE
America	Canada/USA	Lake	Grbić et al., 2020	water	0		0
America	USA	Lake	Hurt et al., 2020	biota (fish)	0		0
Europe	Italy	Lake	Iannilli et al., 2020	biota (macroinvertebrates)	0		1	μFTIR , Nile red	PE and nylon
Asia	Pakistan	Lake	Irfan et al., 2020	water/sediment	1	2	1	FTIR	presence of PET, PP PES, PET, PVC
America	USA	Lake	Lekange et al., 2019	water/sediment	0		1	FTIR	PP
Africa	Kenya	Lake	Migwi wt al., 2020	water	1	2	1	FTIR	PES
Asia	Saudi Arabia	Lake	Picó et al., 2020	water	0		0
Asia	China	Lake	Qin et al., 2020	sediment	0		1	FTIR	PE
Oceania	Indonesia	Lake	Ramadan et al., 2020	water	0		1	FTIR	PE
Europe	Finland	Lake	Scopetani et al., 2019	sediment/ice &snow	0		1	FTIR	PA
Europe	Finland	Lake	Uurasjärvi et al., 2020	water	0		1	FTIR	PET
Asia	China	Lake	Yin et al., 2020	beaches and nearshore	0		1	μRaman	PET
Asia	China	Lake	Wang et al., 2019	water	0		1	FTIR	PE
Asia	Thailand	River	Ta and Babel, 2019	water	0		1	FTIR	PP
Europe	Germany	River	Wagner et al., 2019	water	0		1	Raman	PS
Asia	China	River/Lake	Wang et al., 2020	water	0		1	FTIR	PP
Asia	Taiwan	River	Wong et al., 2020	water	0		1	FTIR	na
Asia	China	River	Zhang et al., 2020	water/sediment	0		1	FTIR	PP
America	USA	River/Lake	Lenaker et al., 2019	water/sediment	0		1	FTIR	PP

## Sheet: graphical_results_polymers
Key
PE	Polyethylene
PET	Polyethylene terephthalate
PP	Polypropylene
PP/EPR	Polypropylene/ethylene-propylene rubber
PS	Polystyrene
PHM	Poly(hexadecyl) methacrylate
EPS	expanded polystyrene
EEAC	Ethylene/ethyl acrylate copolymer
PVC	Polyvinyl chloride
PES	Polyester
APV	acrylates/polyurethane/varnish cluster
PS/DVB	polystyrene-divinylbenzene
PA	polyamide
PTFE	polytetrafluoroethylene
NA	Not available
LDPE	Low desity polyethylene

## Sheet: polymer_continents
	OCEANIA	AMERICA	ASIA	EUROPE	AFRICA		OCEANIA	AMERICA	ASIA	EUROPE	AFRICA
PE	2	10	19	8	2	PE	0.333333	0.47619	0.263889	0.222222	0.5
PET	0	3	7	8	0	PET	0	0.142857	0.0972222	0.222222	0
PP	0	5	25	5	1	PP	0	0.238095	0.347222	0.138889	0.25
PP/EPR	0	0	1	0	0	PP/EPR	0	0	0.0138889	0	0
PS	0	3	5	6	0	PS	0	0.142857	0.0694444	0.166667	0
PHM	1	0	0	0	0	PHM	0.166667	0	0	0	0
EPS	0	0	1	0	0	EPS	0	0	0.0138889	0	0
EEAC	0	0	0	1	0	EEAC	0	0	0	0.0277778	0
PVC	0	0	1	1	0	PVC	0	0	0.0138889	0.0277778	0
	0	0	0	0	0		0	0	0	0	0
PES	3	0	8	2	1	PES	0.5	0	0.111111	0.0555556	0.25
APV	0	0	0	1	0	APV	0	0	0	0.0277778	0
PS/DVB	0	0	0	1	0	PS/DVB	0	0	0	0.0277778	0
PA	0	0	3	3	0	PA	0	0	0.0416667	0.0833333	0
PTFE	0	0	2	0	0	PTFE	0	0	0.0277778	0	0
LDPE	0	0	1	1	0	LDPE	0	0	0.0138889	0.0277778	0
TOT	6	21	72	36	4	129
