# Supplementary material
Source: MDPI journal article supplement (https://www.mdpi.com/1424-2818/12/7/276)
Supplement: s1 [file s1 › TabS5_References.docx]

**Table S5: References for Supplementary Materials.**

| 1. Agustian Fareza, A.; Sembiring, E. Occurence of Microplastics in Water, Sediment and Milkfish (*Chanos chanos*) in Citarum River Downstream (Case Study: Muara Gembong). *E3S Web Conf.* **2020**, *148*, 07005, doi:10.1051/e3sconf/202014807005. |
| --- |
| 1. Akindele, E.O.; Ehlers, S.M.; Koop, J.H.E. First empirical study of freshwater microplastics in West Africa using gastropods from Nigeria as bioindicators. *Limnologica* **2019**, *78*, 125708, doi:10.1016/j.limno.2019.125708. |
| 1. Alam, F.C.; Sembiring, E.; Muntalif, B.S.; Suendo, V. Microplastic distribution in surface water and sediment river around slum and industrial area (case study: Ciwalengke River, Majalaya district, Indonesia). *Chemosphere* **2019**, *224*, 637–645, doi:10.1016/j.chemosphere.2019.02.188. |
| 1. Anderson, P.J.; Warrack, S.; Langen, V.; Challis, J.K.; Hanson, M.L.; Rennie, M.D. Microplastic contamination in Lake Winnipeg, Canada. *Environ. Pollut* **2017**, *225*, 223–231, doi:10.1016/j.envpol.2017.02.072. |
| 1. Andrade, M.C.; Winemiller, K.O.; Barbosa, P.S.; Fortunati, A.; Chelazzi, D.; Cincinelli, A.; Giarrizzo, T. First account of plastic pollution impacting freshwater fishes in the Amazon: Ingestion of plastic debris by piranhas and other serrasalmids with diverse feeding habits. *Environ. Pollut* **2019**, *244*, 766–773, doi:10.1016/j.envpol.2018.10.088. |
| 1. Arias-Andres, M.; Kettner, M.T.; Miki, T.; Grossart, H.-P. Microplastics: New substrates for heterotrophic activity contribute to altering organic matter cycles in aquatic ecosystems. *Sci. Total Environ.* **2018**, *635*, 1152–1159, doi:10.1016/j.scitotenv.2018.04.199. |
| 1. Baldwin, A.K.; Corsi, S.R.; Mason, S.A. Plastic Debris in 29 Great Lakes Tributaries: Relations to watershed attributes and hydrology. *Environ. Sci. Technol.* **2016**, *50*, 10377–10385, doi:10.1021/acs.est.6b02917. |
| 1. Ballent, A.; Corcoran, P.L.; Madden, O.; Helm, P.A.; Longstaffe, F.J. Sources and sinks of microplastics in Canadian Lake Ontario nearshore, tributary and beach sediments. *Mar. Pollut. Bull.* **2016**, *110*, 383–395, doi:10.1016/j.marpolbul.2016.06.037. |
| 1. Battulga, B.; Kawahigashi, M.; Oyuntsetseg, B. Behavior and distribution of polystyrene foams on the shore of Tuul River in Mongolia. *Environ. Pollut* **2020**, *260*, 113979, doi:10.1016/j.envpol.2020.113979. |
| 1. Berglund, E.; Fogelberg, V.; Nilsson, P.A.; Hollander, J. Microplastics in a freshwater mussel (*Anodonta anatina*) in Northern Europe. *Sci. Total Environ.* **2019**, *697*, 134192, doi:10.1016/j.scitotenv.2019.134192. |
| 1. Besseling, E.; Quik, J.T.K.; Sun, M.; Koelmans, A.A. Fate of nano- and microplastic in freshwater systems: A modeling study. *Environ. Pollut* **2017**, *220*, 540–548, doi:10.1016/j.envpol.2016.10.001. |
| 1. Biginagwa, F.J.; Mayoma, B.S.; Shashoua, Y.; Syberg, K.; Khan, F.R. First evidence of microplastics in the African Great Lakes: Recovery from Lake Victoria Nile perch and Nile tilapia. *J. Great Lakes Res.* **2016**, *42*, 146–149, doi:10.1016/j.jglr.2015.10.012. |
| 1. Blair, R.M.; Waldron, S.; Phoenix, V.R.; Gauchotte-Lindsay, C. Microscopy and elemental analysis characterisation of microplastics in sediment of a freshwater urban river in Scotland, UK. *Environ. Sci. Pollut. Res.* **2019**, *26*, 12491–12504, doi:10.1007/s11356-019-04678-1. |
| 1. Blettler, M.C.M.; Ulla, M.A.; Rabuffetti, A.P.; Garello, N. Plastic pollution in freshwater ecosystems: macro-, meso-, and microplastic debris in a floodplain lake. *Environ. Monit. Assess.* **2017**, *189*, 581, doi:10.1007/s10661-017-6305-8. |
| 1. Blettler, M.C.M.; Garello, N.; Ginon, L.; Abrial, E.; Espinola, L.A.; Wantzen, K.M. Massive plastic pollution in a mega-river of a developing country: Sediment deposition and ingestion by fish (*Prochilodus lineatus*). *Environ. Pollut* **2019**, *255*, 113348, doi:10.1016/j.envpol.2019.113348. |
| 1. Bordós, G.; Urbányi, B.; Micsinai, A.; Kriszt, B.; Palotai, Z.; Szabó, I.; Hantosi, Z.; Szoboszlay, S. Identification of microplastics in fish ponds and natural freshwater environments of the Carpathian basin, Europe. *Chemosphere* **2019**, *216*, 110–116, doi:10.1016/j.chemosphere.2018.10.110. |
| 1. Brookson, C.; de Solla, S.R.; Fernie, K.J.; Cepeda, M.; Rochman, C.M. Microplastics in the diet of nestling double-crested cormorants (*Phalacrocorax auratus*), an obligate piscivore in a freshwater ecosystem. *Can. J. Fish. Aquat. Sci.* **2019**, *76*, 2156-2163, https://doi.org/10.1139/cjfas-2018-0388. |
| 1. Campanale, C.; Stock, F.; Massarelli, C.; Kochleus, C.; Bagnuolo, G.; Reifferscheid, G.; Uricchio, V.F. Microplastics and their possible sources: The example of Ofanto River in southeast Italy. *Environ. Pollut.* **2020**, *258*, 113284, doi:10.1016/j.envpol.2019.113284. |
| 1. Campbell, S.H.; Williamson, P.R.; Hall, B.D. Microplastics in the gastrointestinal tracts of fish and the water from an urban prairie creek. *FACETS* **2017**, *2*, 395–409, doi:10.1139/facets-2017-0008. |
| 1. Castañeda, R.A.; Avlijas, S.; Simard, M.A.; Ricciardi, A. Microplastic pollution in St. Lawrence River sediments. *Can. J. Fish. Aquat. Sci.* **2014**, *71*, 1767–1771, doi:10.1139/cjfas-2014-0281. |
| 1. Cheung, P.K.; Hung, P.L.; Fok, L. River microplastic contamination and dynamics upon a rainfall event in Hong Kong, China. *Environ. Process.* **2019**, *6*, 253–264, doi:10.1007/s40710-018-0345-0. |
| 1. Collard, F.; Gasperi, J.; Gilbert, B.; Eppe, G.; Azimi, S.; Rocher, V.; Tassin, B. Anthropogenic particles in the stomach contents and liver of the freshwater fish *Squalius cephalus*. *Sci. Total Environ.* **2018**, *643*, 1257–1264, doi:10.1016/j.scitotenv.2018.06.313. |
| 1. Constant, M.; Ludwig, W.; Kerhervé, P.; Sola, J.; Charrière, B.; Sanchez-Vidal, A.; Canals, M.; Heussner, S. Microplastic fluxes in a large and a small Mediterranean river catchments: The Têt and the Rhône, Northwestern Mediterranean Sea. *Sci. Total Environ.* **2020**, *716*, 136984, doi:10.1016/j.scitotenv.2020.136984. |
| 1. Corcoran, P.L.; Belontz, S.L.; Ryan, K.; Walzak, M.J. Factors Controlling the Distribution of Microplastic Particles in Benthic Sediment of the Thames River, Canada. *Environ. Sci. Technol.* **2020**, *54*, 818–825, doi:10.1021/acs.est.9b04896. |
| 1. Corcoran, P.L.; Norris, T.; Ceccanese, T.; Walzak, M.J.; Helm, P.A.; Marvin, C.H. Hidden plastics of Lake Ontario, Canada and their potential preservation in the sediment record. *Environ. Pollut.* **2015**, *204*, 17–25, doi:10.1016/j.envpol.2015.04.009. |
| 1. Corti, A.; Vinciguerra, V.; Iannilli, V.; Pietrelli, L.; Manariti, A.; Bianchi, S.; Petri, A.; Cifelli, M.; Domenici, V.; Castelvetro, V. thorough multianalytical characterization and quantification of micro- and nanoplastics from Bracciano Lake’s sediments. *Sustainability* **2020**, *12*, 878, doi:10.3390/su12030878. |
| 1. Crew, A.; Gregory-Eaves, I.; Ricciardi, A. Distribution, abundance, and diversity of microplastics in the upper St. Lawrence River. *Environ. Pollut.* **2020**, *260*, 113994, doi:10.1016/j.envpol.2020.113994. |
| 1. Dean, B.Y.; Corcoran, P.L.; Helm, P.A. Factors influencing microplastic abundances in nearshore, tributary and beach sediments along the Ontario shoreline of Lake Erie. *J. Great Lakes Res.* **2018**, *44*, 1002–1009, doi:10.1016/j.jglr.2018.07.014. |
| 1. Deng, H.; Wei, R.; Luo, W.; Hu, L.; Li, B.; Di, Y.; Shi, H. Microplastic pollution in water and sediment in a textile industrial area. *Environ. Pollut.* **2020**, *258*, 113658, doi:10.1016/j.envpol.2019.113658. |
| 1. Di, M.; Wang, J. Microplastics in surface waters and sediments of the Three Gorges Reservoir, China. *Sci. Total Environ.* **2018**, *616–617*, 1620–1627, doi:10.1016/j.scitotenv.2017.10.150. |
| 1. Dikareva, N.; Simon, K.S. Microplastic pollution in streams spanning an urbanisation gradient. *Environ. Pollut.* **2019**, *250*, 292–299, doi:10.1016/j.envpol.2019.03.105. |
| 1. Ding, L.; Mao, R. fan; Guo, X.; Yang, X.; Zhang, Q.; Yang, C. Microplastics in surface waters and sediments of the Wei River, in the northwest of China. *Sci. Total Environ.* **2019**, *667*, 427–434, doi:10.1016/j.scitotenv.2019.02.332. |
| 1. Domogalla-Urbansky, J.; Anger, P.M.; Ferling, H.; Rager, F.; Wiesheu, A.C.; Niessner, R.; Ivleva, N.P.; Schwaiger, J. Raman microspectroscopic identification of microplastic particles in freshwater bivalves (*Unio pictorum*) exposed to sewage treatment plant effluents under different exposure scenarios. *Environ. Sci. Pollut. Res.* **2019**, *26*, 2007–2012, doi:10.1007/s11356-018-3609-3. |
| 1. Dong, M.; Luo, Z.; Jiang, Q.; Xing, X.; Zhang, Q.; Sun, Y. The rapid increases in microplastics in urban lake sediments. *Sci. Rep.* **2020**, *10*, 848, doi:10.1038/s41598-020-57933-8. |
| 1. Dris, R.; Gasperi, J.; Rocher, V.; Saad, M.; Renault, N.; Tassin, B. Microplastic contamination in an urban area: a case study in Greater Paris. *Environ. Chem.* **2015**, *12*, 592, doi:10.1071/EN14167. |
| 1. Dris, R.; Gasperi, J.; Rocher, V.; Tassin, B. Synthetic and non-synthetic anthropogenic fibers in a river under the impact of Paris Megacity: Sampling methodological aspects and flux estimations. *Sci. Total Environ.* **2018**, *618*, 157–164, doi:10.1016/j.scitotenv.2017.11.009. |
| 1. Ebere, E.C.; Wirnkor, V.A.; Ngozi, V.E.; Chukwuemeka, I.S. Macrodebris and microplastics pollution in Nigeria: first report on abundance, distribution and composition. *Environ. Anal. Health Toxicol.* **2019**, *34*, e2019012, doi.org/10.5620/eaht.e2019012. |
| 1. Egessa, R.; Nankabirwa, A.; Basooma, R.; Nabwire, R. Occurrence, distribution and size relationships of plastic debris along shores and sediment of northern Lake Victoria. *Environ. Pollut.* **2020**, *257*, 113442, doi:10.1016/j.envpol.2019.113442. |
| 1. Eo, S.; Hong, S.H.; Song, Y.K.; Han, G.M.; Shim, W.J. Spatiotemporal distribution and annual load of microplastics in the Nakdong River, South Korea. *Water Res.* **2019**, *160*, 228–237, doi:10.1016/j.watres.2019.05.053. |
| 1. Eriksen, M.; Mason, S.; Wilson, S.; Box, C.; Zellers, A.; Edwards, W.; Farley, H.; Amato, S. Microplastic pollution in the surface waters of the Laurentian Great Lakes. *Mar. Pollut. Bull.* **2013**, *77*, 177–182, doi:10.1016/j.marpolbul.2013.10.007. |
| 1. Estahbanati, S.; Fahrenfeld, N.L. Influence of wastewater treatment plant discharges on microplastic concentrations in surface water. *Chemosphere* **2016**, *162*, 277–284, doi:10.1016/j.chemosphere.2016.07.083. |
| 1. Fan, Y.; Zheng, K.; Zhu, Z.; Chen, G.; Peng, X. Distribution, sedimentary record, and persistence of microplastics in the Pearl River catchment, China. *Environ. Pollut.* **2019**, *251*, 862–870, doi:10.1016/j.envpol.2019.05.056. |
| 1. Faure, F.; Corbaz, M.; Baecher, H.; Felippe, L. Pollution due to plastics and microplastics in Lake Geneva and in the Mediterranean Sea. *Arch. Sci*. **2012**, *65*, 57-164. |
| 1. Faure, F.; Demars, C.; Wieser, O.; Kunz, M.; de Alencastro, L.F. Plastic pollution in Swiss surface waters: nature and concentrations, interaction with pollutants. *Environ. Chem.* **2015**, *12*, 582, doi:10.1071/EN14218. |
| 1. Fischer, E.K.; Paglialonga, L.; Czech, E.; Tamminga, M. Microplastic pollution in lakes and lake shoreline sediments – A case study on Lake Bolsena and Lake Chiusi (central Italy). *Environ. Pollut.* **2016**, *213*, 648–657, doi:10.1016/j.envpol.2016.03.012. |
| 1. Free, C.M.; Jensen, O.P.; Mason, S.A.; Eriksen, M.; Williamson, N.J.; Boldgiv, B. High-levels of microplastic pollution in a large, remote, mountain lake. *Mar. Pollut. Bull.* **2014**, *85*, 156–163, doi:10.1016/j.marpolbul.2014.06.001. |
| 1. Grbić, J.; Helm, P.; Athey, S.; Rochman, C.M. Microplastics entering northwestern Lake Ontario are diverse and linked to urban sources. *Water Res.* **2020**, *174*, 115623, doi:10.1016/j.watres.2020.115623. |
| 1. Guerranti, C.; Cannas, S.; Scopetani, C.; Fastelli, P.; Cincinelli, A.; Renzi, M. Plastic litter in aquatic environments of Maremma Regional Park (Tyrrhenian Sea, Italy): Contribution by the Ombrone river and levels in marine sediments. *Mar. Pollut. Bull.* **2017**, *117*, 366–370, doi:10.1016/j.marpolbul.2017.02.021. |
| 1. He, B.; Goonetilleke, A.; Ayoko, G.A.; Rintoul, L. Abundance, distribution patterns, and identification of microplastics in Brisbane River sediments, Australia. *Sci. Total Environ.* **2020**, *700*, 134467, doi:10.1016/j.scitotenv.2019.134467. |
| 1. Hendrickson, E.; Minor, E.C.; Schreiner, K. Microplastic abundance and composition in Western Lake Superior as determined via microscopy, Pyr-GC/MS, and FTIR. *Environ. Sci. Technol.* **2018**, *52*, 1787–1796, doi:10.1021/acs.est.7b05829. |
| 1. Hoellein, T.J.; McCormick, A.R.; Hittie, J.; London, M.G.; Scott, J.W.; Kelly, J.J. Longitudinal patterns of microplastic concentration and bacterial assemblages in surface and benthic habitats of an urban river. *Freshw. Sci.* **2017**, *36*, 491–507, doi:10.1086/693012. |
| 1. Hoellein, T.J.; Shogren, A.J.; Tank, J.L.; Risteca, P.; Kelly, J.J. Microplastic deposition velocity in streams follows patterns for naturally occurring allochthonous particles. *Sci. Rep.* **2019**, *9*, 3740, doi:10.1038/s41598-019-40126-3. |
| 1. Hoffman, M.J.; Hittinger, E. Inventory and transport of plastic debris in the Laurentian Great Lakes. *Mar. Pollut. Bull.* **2017**, *115*, 273–281, doi:10.1016/j.marpolbul.2016.11.061. |
| 1. Holland, E.R.; Mallory, M.L.; Shutler, D. Plastics and other anthropogenic debris in freshwater birds from Canada. *Sci. Total Environ.* **2016**, *571*, 251–258, doi:10.1016/j.scitotenv.2016.07.158. |
| 1. Holmes, C.M.; Dyer, S.D.; Vamshi, R.; Maples‐Reynolds, N.; Davies, I.A. A national‐scale framework for visualizing riverine concentrations of microplastics released from municipal wastewater treatment incorporating generalized instream losses. *Environ. Toxicol. Chem.* **2020**, *39*, 210–219, doi:10.1002/etc.4610. |
| 1. Horton, A.A.; Jürgens, M.D.; Lahive, E.; van Bodegom, P.M.; Vijver, M.G. The influence of exposure and physiology on microplastic ingestion by the freshwater fish *Rutilus rutilus* (roach) in the River Thames, UK. *Environ. Pollut.* **2018**, *236*, 188–194, doi:10.1016/j.envpol.2018.01.044. |
| 1. Horton, A.A.; Svendsen, C.; Williams, R.J.; Spurgeon, D.J.; Lahive, E. Large microplastic particles in sediments of tributaries of the River Thames, UK – Abundance, sources and methods for effective quantification. *Mar. Pollut. Bull.* **2017**, *114*, 218–226, doi:10.1016/j.marpolbul.2016.09.004. |
| 1. Hurley, R.R.; Woodward, J.C.; Rothwell, J.J. Ingestion of microplastics by freshwater tubifex worms. *Environ. Sci. Technol.* **2017**, *51*, 12844–12851, doi:10.1021/acs.est.7b03567. |
| 1. Hurley, R.; Woodward, J.; Rothwell, J.J. Microplastic contamination of river beds significantly reduced by catchment-wide flooding. *Nat. Geosci.* **2018**, *11*, 251–257, doi:10.1038/s41561-018-0080-1. |
| 1. Hurt, R.; O’Reilly, C.M.; Perry, W.L. Microplastic prevalence in two fish species in two U.S. reservoirs. *Limnol. Oceanogr.* **2020**, *5*, 147–153, doi:10.1002/lol2.10140. |
| 1. Iannilli, V.; Corami, F.; Grasso, P.; Lecce, F.; Buttinelli, M.; Setini, A. Plastic abundance and seasonal variation on the shorelines of three volcanic lakes in Central Italy: can amphipods help detect contamination? *Environ. Sci. Pollut. Res.* **2020**, *27*, 14711–14722, doi:10.1007/s11356-020-07954-7. |
| 1. Imhof, H.K.; Laforsch, C.; Wiesheu, A.C.; Schmid, J.; Anger, P.M.; Niessner, R.; Ivleva, N.P. Pigments and plastic in limnetic ecosystems: A qualitative and quantitative study on microparticles of different size classes. *Water Res.* **2016**, *98*, 64–74, doi:10.1016/j.watres.2016.03.015. |
| 1. Imhof, H.K.; Wiesheu, A.C.; Anger, P.M.; Niessner, R.; Ivleva, N.P.; Laforsch, C. Variation in plastic abundance at different lake beach zones - A case study. *Sci. Total Environ.* **2018**, *613–614*, 530–537, doi:10.1016/j.scitotenv.2017.08.300. |
| 1. Irfan, T.; Khalid, S.; Taneez, M.; Hashmi, M.Z. Plastic driven pollution in Pakistan: the first evidence of environmental exposure to microplastic in sediments and water of Rawal Lake. *Environ. Sci. Pollut. Res.* **2020**, *27*, 15083–15092, doi:10.1007/s11356-020-07833-1. |
| 1. Jabeen, K.; Su, L.; Li, J.; Yang, D.; Tong, C.; Mu, J.; Shi, H. Microplastics and mesoplastics in fish from coastal and fresh waters of China. *Environ. Pollut.* **2017**, *221*, 141–149, doi:10.1016/j.envpol.2016.11.055. |
| 1. Jia, Y.-W.; Huang, Z.; Hu, L.-X.; Liu, S.; Li, H.-X.; Li, J.-L.; Chen, C.-E.; Xu, X.-R.; Zhao, J.-L.; Ying, G.-G. Occurrence and mass loads of biocides in plastic debris from the Pearl River system, South China. *Chemosphere* **2020**, *246*, 125771, doi:10.1016/j.chemosphere.2019.125771. |
| 1. Jiang, C.; Yin, L.; Li, Z.; Wen, X.; Luo, X.; Hu, S.; Yang, H.; Long, Y.; Deng, B.; Huang, L.; et al. Microplastic pollution in the rivers of the Tibet Plateau. *Environ. Pollut.* **2019**, *249*, 91–98, doi:10.1016/j.envpol.2019.03.022. |
| 1. Jiang, C.; Yin, L.; Wen, X.; Du, C.; Wu, L.; Long, Y.; Liu, Y.; Ma, Y.; Yin, Q.; Zhou, Z.; et al. Microplastics in sediment and surface water of West Dongting Lake and South Dongting Lake: abundance, source and composition. *IJERPH* **2018**, *15*, 2164, doi:10.3390/ijerph15102164. |
| 1. Kapp, K.J.; Yeatman, E. Microplastic hotspots in the Snake and Lower Columbia rivers: A journey from the Greater Yellowstone Ecosystem to the Pacific Ocean. *Environ. Pollut.* **2018**, *241*, 1082–1090, doi:10.1016/j.envpol.2018.06.033. |
| 1. Kataoka, T.; Nihei, Y.; Kudou, K.; Hinata, H. Assessment of the sources and inflow processes of microplastics in the river environments of Japan. *Environ. Pollut.* **2019**, *244*, 958–965, doi:10.1016/j.envpol.2018.10.111. |
| 1. Kettner, M.T.; Oberbeckmann, S.; Labrenz, M.; Grossart, H.-P. The eukaryotic life on microplastics in brackish ecosystems. *Front. Microbiol.* **2019**, *10*, 538, doi:10.3389/fmicb.2019.00538. |
| 1. Kettner, M.T.; Rojas-Jimenez, K.; Oberbeckmann, S.; Labrenz, M.; Grossart, H.-P. Microplastics alter composition of fungal communities in aquatic ecosystems: Fungal communities on microplastics. *Environ. Microbiol.* **2017**, *19*, 4447–4459, doi:10.1111/1462-2920.13891. |
| 1. Klein, S.; Worch, E.; Knepper, T.P. Occurrence and spatial distribution of microplastics in river shore sediments of the Rhine-Main area in Germany. *Environ. Sci. Technol.* **2015**, *49*, 6070–6076, doi:10.1021/acs.est.5b00492. |
| 1. Kong, X.; Koelmans, A.A. Modeling Decreased resilience of shallow lake ecosystems toward eutrophication due to microplastic ingestion across the food web. *Environ. Sci. Technol.* **2019**, *53*, 13822–13831, doi:10.1021/acs.est.9b03905. |
| 1. Lahens, L.; Strady, E.; Kieu-Le, T.-C.; Dris, R.; Boukerma, K.; Rinnert, E.; Gasperi, J.; Tassin, B. Macroplastic and microplastic contamination assessment of a tropical river (Saigon River, Vietnam) transversed by a developing megacity. *Environ. Pollut.* **2018**, *236*, 661–671, doi:10.1016/j.envpol.2018.02.005. |
| 1. Lebreton, L.C.M.; van der Zwet, J.; Damsteeg, J.-W.; Slat, B.; Andrady, A.; Reisser, J. River plastic emissions to the world’s oceans. *Nat. Commun.* **2017**, *8*, 15611, doi:10.1038/ncomms15611. |
| 1. Lechner, A.; Keckeis, H.; Lumesberger-Loisl, F.; Zens, B.; Krusch, R.; Tritthart, M.; Glas, M.; Schludermann, E. The Danube so colourful: A potpourri of plastic litter outnumbers fish larvae in Europe’s second largest river. *Environ. Pollut.* **2014**, *188*, 177–181, doi:10.1016/j.envpol.2014.02.006. |
| 1. Lenaker, P.L.; Baldwin, A.K.; Corsi, S.R.; Mason, S.A.; Reneau, P.C.; Scott, J.W. Vertical distribution of microplastics in the water column and surficial sediment from the Milwaukee River Basin to Lake Michigan. *Environ. Sci. Technol.* **2019**, *53*, 12227–12237, doi:10.1021/acs.est.9b03850. |
| 1. Leslie, H.A.; Brandsma, S.H.; van Velzen, M.J.M.; Vethaak, A.D. Microplastics en route: Field measurements in the Dutch river delta and Amsterdam canals, wastewater treatment plants, North Sea sediments and biota. *Environ. Int.* **2017**, *101*, 133–142, doi:10.1016/j.envint.2017.01.018. |
| 1. Li, L.; Geng, S.; Wu, C.; Song, K.; Sun, F.; Visvanathan, C.; Xie, F.; Wang, Q. Microplastics contamination in different trophic state lakes along the middle and lower reaches of Yangtze River Basin. *Environ. Pollut.* **2019**, *254*, 112951, doi:10.1016/j.envpol.2019.07.119. |
| 1. Lin, L.; Zuo, L.-Z.; Peng, J.-P.; Cai, L.-Q.; Fok, L.; Yan, Y.; Li, H.-X.; Xu, X.-R. Occurrence and distribution of microplastics in an urban river: A case study in the Pearl River along Guangzhou City, China. *Sci. Total Environ.* **2018**, *644*, 375–381, doi:10.1016/j.scitotenv.2018.06.327. |
| 1. Liu, Y.; Zhang, J.; Cai, C.; He, Y.; Chen, L.; Xiong, X.; Huang, H.; Tao, S.; Liu, W. Occurrence and characteristics of microplastics in the Haihe River: An investigation of a seagoing river flowing through a megacity in northern China. *Environ. Pollut.* **2020**, *262*, 114261, doi:10.1016/j.envpol.2020.114261. |
| 1. Luo, W.; Su, L.; Craig, N.J.; Du, F.; Wu, C.; Shi, H. Comparison of microplastic pollution in different water bodies from urban creeks to coastal waters. *Environ. Pollut.* **2019**, *246*, 174–182, doi:10.1016/j.envpol.2018.11.081. |
| 1. Luoto, T.P.; Rantala, M.V.; Kivilä, E.H.; Nevalainen, L.; Ojala, A.E.K. Biogeochemical cycling and ecological thresholds in a High Arctic lake (Svalbard). *Aquat. Sci.* **2019**, *81*, 34, doi:10.1007/s00027-019-0630-7. |
| 1. Mani, T.; Blarer, P.; Storck, F.R.; Pittroff, M.; Wernicke, T.; Burkhardt-Holm, P. Repeated detection of polystyrene microbeads in the Lower Rhine River. *Environ. Pollut.* **2019a**, *245*, 634–641, doi:10.1016/j.envpol.2018.11.036. |
| 1. Mani, T.; Burkhardt-Holm, P. Seasonal microplastics variation in nival and pluvial stretches of the Rhine River – From the Swiss catchment towards the North Sea. *Sci. Total Environ.* **2020**, *707*, 135579, doi:10.1016/j.scitotenv.2019.135579. |
| 1. Mani, T.; Hauk, A.; Walter, U.; Burkhardt-Holm, P. Microplastics profile along the Rhine River. *Sci. Rep.* **2016**, *5*, 17988, doi:10.1038/srep17988. |
| 1. Mani, T.; Primpke, S.; Lorenz, C.; Gerdts, G.; Burkhardt-Holm, P. microplastic pollution in benthic midstream sediments of the Rhine River. *Environ. Sci. Technol.* **2019b**, *53*, 6053–6062, doi:10.1021/acs.est.9b01363. |
| 1. Mason, S.A.; Kammin, L.; Eriksen, M.; Aleid, G.; Wilson, S.; Box, C.; Williamson, N.; Riley, A. Pelagic plastic pollution within the surface waters of Lake Michigan, USA. *J. Great Lakes Res.* **2016**, *42*, 753–759, doi:10.1016/j.jglr.2016.05.009. |
| 1. McCormick, A.; Hoellein, T.J.; Mason, S.A.; Schluep, J.; Kelly, J.J. Microplastic is an abundant and distinct microbial habitat in an Urban River. *Environ. Sci. Technol.* **2014**, *48*, 11863–11871, doi:10.1021/es503610r. |
| 1. McCormick, A.R.; Hoellein, T.J.; London, M.G.; Hittie, J.; Scott, J.W.; Kelly, J.J. Microplastic in surface waters of urban rivers: concentration, sources, and associated bacterial assemblages. *Ecosphere* **2016**, *7*, doi:10.1002/ecs2.1556. |
| 1. McGoran, A.R.; Clark, P.F.; Morritt, D. Presence of microplastic in the digestive tracts of European flounder, *Platichthys flesus*, and European smelt, *Osmerus eperlanus*, from the River Thames. *Environ. Pollut.* **2017**, *220*, 744–751, doi:10.1016/j.envpol.2016.09.078. |
| 1. McNeish, R.E.; Kim, L.H.; Barrett, H.A.; Mason, S.A.; Kelly, J.J.; Hoellein, T.J. Microplastic in riverine fish is connected to species traits. *Sci. Rep.* **2018**, *8*, 11639, doi:10.1038/s41598-018-29980-9. |
| 1. Migwi, F.K.; Ogunah, J.A.; Kiratu, J.M. Occurrence and spatial distribution of microplastics in the surface waters of Lake Naivasha, Kenya. *Environ. Toxicol. Chem.* **2020**, *39*, 765–774, doi:10.1002/etc.4677. |
| 1. Miller, R.Z.; Watts, A.J.R.; Winslow, B.O.; Galloway, T.S.; Barrows, A.P.W. Mountains to the sea: River study of plastic and non-plastic microfiber pollution in the northeast USA. *Mar. Pollut. Bull.* **2017**, *124*, 245–251, doi:10.1016/j.marpolbul.2017.07.028. |
| 1. Nan, B.; Su, L.; Kellar, C.; Craig, N.J.; Keough, M.J.; Pettigrove, V. Identification of microplastics in surface water and Australian freshwater shrimp *Paratya australiensis* in Victoria, Australia. *Environ. Pollut.* **2020**, *259*, 113865, doi:10.1016/j.envpol.2019.113865. |
| 1. Nel, H.A.; Dalu, T.; Wasserman, R.J. Sinks and sources: Assessing microplastic abundance in river sediment and deposit feeders in an Austral temperate urban river system. *Sci. Total Environ.* **2018**, *612*, 950–956, doi:10.1016/j.scitotenv.2017.08.298. |
| 1. Nizzetto, L.; Bussi, G.; Futter, M.N.; Butterfield, D.; Whitehead, P.G. A theoretical assessment of microplastic transport in river catchments and their retention by soils and river sediments. *Environ. Sci.-Proc. Imp.* **2016**, *18*, 1050–1059, doi:10.1039/C6EM00206D. |
| 1. Ockelford, A.; Cundy, A.; Ebdon, J.E. Storm response of fluvial sedimentary microplastics. *Sci. Rep.* **2020**, *10*, 1865, doi:10.1038/s41598-020-58765-2. |
| 1. Park, T.-J.; Lee, S.-H.; Lee, M.-S.; Lee, J.-K.; Lee, S.-H.; Zoh, K.-D. Occurrence of microplastics in the Han River and riverine fish in South Korea. *Sci. Total Environ.* **2020**, *708*, 134535, doi:10.1016/j.scitotenv.2019.134535. |
| 1. Peng, G.; Xu, P.; Zhu, B.; Bai, M.; Li, D. Microplastics in freshwater river sediments in Shanghai, China: A case study of risk assessment in mega-cities. *Environ. Pollut.* **2018**, *234*, 448–456, doi:10.1016/j.envpol.2017.11.034. |
| 1. Peters, C.A.; Bratton, S.P. Urbanization is a major influence on microplastic ingestion by sunfish in the Brazos River Basin, Central Texas, USA. *Environ. Pollut.* **2016**, *210*, 380–387, doi:10.1016/j.envpol.2016.01.018. |
| 1. Picó, Y.; Alvarez-Ruiz, R.; Alfarhan, A.H.; El-Sheikh, M.A.; Alshahrani, H.O.; Barceló, D. Pharmaceuticals, pesticides, personal care products and microplastics contamination assessment of Al-Hassa irrigation network (Saudi Arabia) and its shallow lakes. *Sci. Total Environ.* **2020**, *701*, 135021, doi:10.1016/j.scitotenv.2019.135021. |
| 1. Qin, Y.; Wang, Z.; Li, W.; Chang, X.; Yang, J.; Yang, F. Microplastics in the sediment of Lake Ulansuhai of Yellow River Basin, China. *Water Environ. Res.* **2020**, *92*, 829–839, doi:10.1002/wer.1275. |
| 1. Ramandan, A.H.; Sembiring, E. Occurrence of Microplastic in surface water of Jatiluhur Reservoir. *E3S Web Conf.* **2020**, *148*, 07004, doi:10.1051/e3sconf/202014807004. |
| 1. Rao, Z.; Niu, S.; Zhan, N.; Wang, X.; Song, X. Microplastics in sediments of River Yongfeng from Maanshan City, Anhui Province, China. *Bull. Environ. Contam. Toxicol.* **2020**, *104*, 166–172, doi:10.1007/s00128-019-02771-2. |
| 1. Roch, S.; Walter, T.; Ittner, L.D.; Friedrich, C.; Brinker, A. A systematic study of the microplastic burden in freshwater fishes of south-western Germany - Are we searching at the right scale? *Sci. Total Environ.* **2019**, *689*, 1001–1011, doi:10.1016/j.scitotenv.2019.06.404. |
| 1. Rodrigues, M.O.; Abrantes, N.; Gonçalves, F.J.M.; Nogueira, H.; Marques, J.C.; Gonçalves, A.M.M. Spatial and temporal distribution of microplastics in water and sediments of a freshwater system (Antuã River, Portugal). *Sci. Total Environ.* **2018**, *633*, 1549–1559, doi:10.1016/j.scitotenv.2018.03.233. |
| 1. Ryan, M.G.; Watkins, L.; Walter, M.T. Hudson River juvenile Blueback herring avoid ingesting microplastics. *Mar. Pollut. Bull.* **2019**, *146*, 935–939, doi:10.1016/j.marpolbul.2019.07.004. |
| 1. Said, L.; Heard, M.J. Variation in the presence and abundance of anthropogenic microfibers in the Cumberland River in Nashville, TN, USA. *Environ. Sci. Pollut. Res.* **2020**, *27*, 10135–10139, doi:10.1007/s11356-020-08091-x. |
| 1. Sanchez, W.; Bender, C.; Porcher, J.-M. Wild gudgeons (*Gobio gobio*) from French rivers are contaminated by microplastics: Preliminary study and first evidence. *Environ. Res.* **2014**, *128*, 98–100, doi:10.1016/j.envres.2013.11.004. |
| 1. Sarkar, D.J.; Das Sarkar, S.; Das, B.K.; Manna, R.K.; Behera, B.K.; Samanta, S. Spatial distribution of meso and microplastics in the sediments of river Ganga at eastern India. *Sci. Total Environ.* **2019**, *694*, 133712, doi:10.1016/j.scitotenv.2019.133712. |
| 1. Schessl, M.; Johns, C.; Ashpole, S.L. Microbeads in sediment, dreissenid mussels, and anurans in the littoral zone of the Upper St. Lawrence River, New York. *Pollut.* **2019**, *5*, doi:10.22059/poll.2018.257596.468. |
| 1. Schmidt, C.; Krauth, T.; Wagner, S. Export of plastic debris by rivers into the sea. *Environ. Sci. Technol.* **2017**, *51*, 12246–12253, doi:10.1021/acs.est.7b02368. |
| 1. Schmidt, L.K.; Bochow, M.; Imhof, H.K.; Oswald, S.E. Multi-temporal surveys for microplastic particles enabled by a novel and fast application of SWIR imaging spectroscopy – Study of an urban watercourse traversing the city of Berlin, Germany. *Environ. Pollut.* **2018**, *239*, 579–589, doi:10.1016/j.envpol.2018.03.097. |
| 1. Scopetani, C.; Chelazzi, D.; Cincinelli, A.; Esterhuizen-Londt, M. Assessment of microplastic pollution: occurrence and characterisation in Vesijärvi lake and Pikku Vesijärvi pond, Finland. *Environ. Monit. Assess.* **2019**, *191*, 652, doi:10.1007/s10661-019-7843-z. |
| 1. Siegfried, M.; Koelmans, A.A.; Besseling, E.; Kroeze, C. Export of microplastics from land to sea. A modelling approach. *Water Res.* **2017**, *127*, 249–257, doi:10.1016/j.watres.2017.10.011. |
| 1. Sighicelli, M.; Pietrelli, L.; Lecce, F.; Iannilli, V.; Falconieri, M.; Coscia, L.; Di Vito, S.; Nuglio, S.; Zampetti, G. Microplastic pollution in the surface waters of Italian Subalpine Lakes. *Environ. Pollut.* **2018**, *236*, 645–651, doi:10.1016/j.envpol.2018.02.008. |
| 1. Silva-Cavalcanti, J.S.; Silva, J.D.B.; França, E.J. de; Araújo, M.C.B. de; Gusmão, F. Microplastics ingestion by a common tropical freshwater fishing resource. *Environ. Pollut.* **2017**, *221*, 218–226, doi:10.1016/j.envpol.2016.11.068. |
| 1. Simmerman, C.B.; Coleman Wasik, J.K. The effect of urban point source contamination on microplastic levels in water and organisms in a cold‐water stream. *Limnol. Oceanogr.* **2020**, *5*, 137–146, doi:10.1002/lol2.10138. |
| 1. Slootmaekers, B.; Catarci Carteny, C.; Belpaire, C.; Saverwyns, S.; Fremout, W.; Blust, R.; Bervoets, L. Microplastic contamination in gudgeons (*Gobio gobio*) from Flemish rivers (Belgium). *Environ. Pollut.* **2019**, *244*, 675–684, doi:10.1016/j.envpol.2018.09.136. |
| 1. Song, J.; Hou, C.; Zhou, Y.; Liu, Q.; Wu, X.; Wang, Y.; Yi, Y. The flowing of microplastics was accelerated under the influence of artificial flood generated by hydropower station. *J. Clean. Prod.* **2020**, *255*, 120174, doi:10.1016/j.jclepro.2020.120174. |
| 1. Strady, E.; Kieu-Le, T.-C.; Gasperi, J.; Tassin, B. Temporal dynamic of anthropogenic fibers in a tropical river-estuarine system. *Environ. Pollut.* **2020**, *259*, 113897, doi:10.1016/j.envpol.2019.113897. |
| 1. Su, L.; Cai, H.; Kolandhasamy, P.; Wu, C.; Rochman, C.M.; Shi, H. Using the Asian clam as an indicator of microplastic pollution in freshwater ecosystems. *Environ. Pollut.* **2018**, *234*, 347–355, doi:10.1016/j.envpol.2017.11.075. |
| 1. Su, L.; Sharp, S.M.; Pettigrove, V.J.; Craig, N.J.; Nan, B.; Du, F.; Shi, H. Superimposed microplastic pollution in a coastal metropolis. *Water Res.* **2020**, *168*, 115140, doi:10.1016/j.watres.2019.115140. |
| 1. Su, L.; Xue, Y.; Li, L.; Yang, D.; Kolandhasamy, P.; Li, D.; Shi, H. Microplastics in Taihu Lake, China. *Environ. Pollut.* **2016**, *216*, 711–719, doi:10.1016/j.envpol.2016.06.036. |
| 1. Ta, A.; Babel, S. Microplastic pollution in surface water of the Chao Phraya River in Ang Thong area. *EnvironmentAsia* **2019**, *12*, 4853, doi:10.14456/EA.2019.62. |
| 1. Tan, X.; Yu, X.; Cai, L.; Wang, J.; Peng, J. Microplastics and associated PAHs in surface water from the Feilaixia Reservoir in the Beijiang River, China. *Chemosphere* **2019**, *221*, 834–840, doi:10.1016/j.chemosphere.2019.01.022. |
| 1. Tibbetts, J.; Krause, S.; Lynch, I.; Sambrook Smith, G. Abundance, distribution, and drivers of microplastic contamination in urban river environments. *Water* **2018**, *10*, 1597, doi:10.3390/w10111597. |
| 1. Toumi, H.; Abidli, S.; Bejaoui, M. Microplastics in freshwater environment: the first evaluation in sediments from seven water streams surrounding the lagoon of Bizerte (Northern Tunisia). *Environ. Sci. Pollut. Res.* **2019**, *26*, 14673–14682, doi:10.1007/s11356-019-04695-0. |
| 1. Turner, S.; Horton, A.A.; Rose, N.L.; Hall, C. A temporal sediment record of microplastics in an urban lake, London, UK. *J. Paleolimnol.* **2019**, *61*, 449–462, doi:10.1007/s10933-019-00071-7. |
| 1. Unice, K.M.; Weeber, M.P.; Abramson, M.M.; Reid, R.C.D.; van Gils, J.A.G.; Markus, A.A.; Vethaak, A.D.; Panko, J.M. Characterizing export of land-based microplastics to the estuary - Part I: Application of integrated geospatial microplastic transport models to assess tire and road wear particles in the Seine watershed. *Sci. Total Environ.* **2019a**, *646*, 1639–1649, doi:10.1016/j.scitotenv.2018.07.368. |
| 1. Unice, K.M.; Weeber, M.P.; Abramson, M.M.; Reid, R.C.D.; van Gils, J.A.G.; Markus, A.A.; Vethaak, A.D.; Panko, J.M. Characterizing export of land-based microplastics to the estuary - Part II: Sensitivity analysis of an integrated geospatial microplastic transport modeling assessment of tire and road wear particles. *Sci. Total Environ.* **2019b**, *646*, 1650–1659, doi:10.1016/j.scitotenv.2018.08.301. |
| 1. Uurasjärvi, E.; Hartikainen, S.; Setälä, O.; Lehtiniemi, M.; Koistinen, A. Microplastic concentrations, size distribution, and polymer types in the surface waters of a northern European lake. *Water Environ. Res.* **2020**, *92*, 149–156, doi:10.1002/wer.1229. |
| 1. Vaughan, R.; Turner, S.D.; Rose, N.L. Microplastics in the sediments of a UK urban lake. *Environ. Pollut.* **2017**, *229*, 10–18, doi:10.1016/j.envpol.2017.05.057. |
| 1. Vermaire, J.C.; Pomeroy, C.; Herczegh, S.M.; Haggart, O.; Murphy, M. Microplastic abundance and distribution in the open water and sediment of the Ottawa River, Canada, and its tributaries. *FACETS* **2017**, *2*, 301–314, doi:10.1139/facets-2016-0070. |
| 1. Wagner, S.; Klöckner, P.; Stier, B.; Römer, M.; Seiwert, B.; Reemtsma, T.; Schmidt, C. Relationship between discharge and river plastic concentrations in a rural and an urban catchment. *Environ. Sci. Technol.* **2019**, *53*, 10082–10091, doi:10.1021/acs.est.9b03048. |
| 1. Waldschläger, K.; Schüttrumpf, H. Erosion behavior of different microplastic particles in comparison to natural sediments. *Environ. Sci. Technol.* **2019**, *53*, 13219–13227, doi:10.1021/acs.est.9b05394. |
| 1. Wang, G.; Lu, J.; Tong, Y.; Liu, Z.; Zhou, H.; Xiayihazi, N. Occurrence and pollution characteristics of microplastics in surface water of the Manas River Basin, China. *Sci. Total Environ.* **2020**, *710*, 136099, doi:10.1016/j.scitotenv.2019.136099. |
| 1. Wang, J.; Peng, J.; Tan, Z.; Gao, Y.; Zhan, Z.; Chen, Q.; Cai, L. Microplastics in the surface sediments from the Beijiang River littoral zone: Composition, abundance, surface textures and interaction with heavy metals. *Chemosphere* **2017b**, *171*, 248–258, doi:10.1016/j.chemosphere.2016.12.074. |
| 1. Wang, W.; Ndungu, A.W.; Li, Z.; Wang, J. Microplastics pollution in inland freshwaters of China: A case study in urban surface waters of Wuhan, China. *Sci. Total Environ.* **2017a**, *575*, 1369–1374, doi:10.1016/j.scitotenv.2016.09.213. |
| 1. Wang, W.; Yuan, W.; Chen, Y.; Wang, J. Microplastics in surface waters of Dongting Lake and Hong Lake, China. *Sci. Total Environ.* **2018a**, *633*, 539–545, doi:10.1016/j.scitotenv.2018.03.211. |
| 1. Wang, Z.; Su, B.; Xu, X.; Di, D.; Huang, H.; Mei, K.; Dahlgren, R.A.; Zhang, M.; Shang, X. Preferential accumulation of small (<300 μm) microplastics in the sediments of a coastal plain river network in eastern China. *Water Res.* **2018b**, *144*, 393–401, doi:10.1016/j.watres.2018.07.050. |
| 1. Wang, Z.; Qin, Y.; Li, W.; Yang, W.; Meng, Q.; Yang, J. Microplastic contamination in freshwater: first observation in Lake Ulansuhai, Yellow River Basin, China. *Environ. Chem. Lett.* **2019**, *17*, 1821–1830, doi:10.1007/s10311-019-00888-8. |
| 1. Watkins, L.; Sullivan, P.J.; Walter, M.T. A case study investigating temporal factors that influence microplastic concentration in streams under different treatment regimes. *Environ. Sci. Pollut. Res.* **2019**, *26*, 21797–21807. |
| 1. Wen, X.; Du, C.; Xu, P.; Zeng, G.; Huang, D.; Yin, L.; Yin, Q.; Hu, L.; Wan, J.; Zhang, J.; et al. Microplastic pollution in surface sediments of urban water areas in Changsha, China: Abundance, composition, surface textures. *Mar. Pollut. Bull.* **2018**, *136*, 414–423, doi:10.1016/j.marpolbul.2018.09.043. |
| 1. Windsor, F.M.; Tilley, R.M.; Tyler, C.R.; Ormerod, S.J. Microplastic ingestion by riverine macroinvertebrates. *Sci. Total Environ.* **2019**, *646*, 68–74, doi:10.1016/j.scitotenv.2018.07.271. |
| 1. Wong, G.; Löwemark, L.; Kunz, A. Microplastic pollution of the Tamsui River and its tributaries in northern Taiwan: Spatial heterogeneity and correlation with precipitation. *Environ. Pollut.* **2020**, *260*, 113935, doi:10.1016/j.envpol.2020.113935. |
| 1. Xiong, X.; Zhang, K.; Chen, X.; Shi, H.; Luo, Z.; Wu, C. Sources and distribution of microplastics in China’s largest inland lake – Qinghai Lake. *Environ. Pollut.* **2018**, *235*, 899–906, doi:10.1016/j.envpol.2017.12.081. |
| 1. Yan, M.; Nie, H.; Xu, K.; He, Y.; Hu, Y.; Huang, Y.; Wang, J. Microplastic abundance, distribution and composition in the Pearl River along Guangzhou city and Pearl River estuary, China. *Chemosphere* **2019**, *217*, 879–886, doi:10.1016/j.chemosphere.2018.11.093. |
| 1. Yin, L.; Jiang, C.; Wen, X.; Du, C.; Zhong, W.; Feng, Z.; Long, Y.; Ma, Y. Microplastic pollution in surface water of urban lakes in Changsha, China. *IJERPH* **2019**, *16*, 1650, doi:10.3390/ijerph16091650. |
| 1. Yin, L.; Wen, X.; Du, C.; Jiang, J.; Wu, L.; Zhang, Y.; Hu, Z.; Hu, S.; Feng, Z.; Zhou, Z.; et al. Comparison of the abundance of microplastics between rural and urban areas: A case study from East Dongting Lake. *Chemosphere* **2020**, *244*, 125486, doi:10.1016/j.chemosphere.2019.125486. |
| 1. Yuan, W.; Liu, X.; Wang, W.; Di, M.; Wang, J. Microplastic abundance, distribution and composition in water, sediments, and wild fish from Poyang Lake, China. *Ecotox. Environ. Safe.* **2019**, *170*, 180–187, doi:10.1016/j.ecoenv.2018.11.126. |
| 1. Zhang, K.; Chen, X.; Xiong, X.; Ruan, Y.; Zhou, H.; Wu, C.; Lam, P.K.S. The hydro-fluctuation belt of the Three Gorges Reservoir: Source or sink of microplastics in the water? *Environ. Pollut.* **2019**, *248*, 279–285, doi:10.1016/j.envpol.2019.02.043. |
| 1. Zhang, K.; Gong, W.; Lv, J.; Xiong, X.; Wu, C. Accumulation of floating microplastics behind the Three Gorges Dam. *Environ. Pollut.* **2015**, *204*, 117–123, doi:10.1016/j.envpol.2015.04.023. |
| 1. Zhang, K.; Su, J.; Xiong, X.; Wu, X.; Wu, C.; Liu, J. Microplastic pollution of lakeshore sediments from remote lakes in Tibet plateau, China. *Environ. Pollut.* **2016**, *219*, 450–455, doi:10.1016/j.envpol.2016.05.048. |
| 1. Zhang, K.; Xiong, X.; Hu, H.; Wu, C.; Bi, Y.; Wu, Y.; Zhou, B.; Lam, P.K.S.; Liu, J. Occurrence and characteristics of microplastic pollution in Xiangxi Bay of Three Gorges Reservoir, China. *Environ. Sci. Technol.* **2017**, *51*, 3794–3801, doi:10.1021/acs.est.7b00369. |
| 1. Zhang, L.; Liu, J.; Xie, Y.; Zhong, S.; Yang, B.; Lu, D.; Zhong, Q. Distribution of microplastics in surface water and sediments of Qin river in Beibu Gulf, China. *Sci. Total Environ.* **2020**, *708*, 135176, doi:10.1016/j.scitotenv.2019.135176. |
